# Supplementary material for: Microglia govern the extinction of acute stress-induced anxiety-like behaviors in male mice
Source: PubMed Central journal article supplement (PMC10781988; doi:10.1038/s41467-024-44704-6), 2024-01-10
Supplement: 41467_2024_44704_MOESM1_ESM.pdf [file 41467_2024_44704_MOESM1_ESM.pdf]

**Title: Microglia govern the extinction of acute stress-induced anxiety-like behaviors in male mice**

**Authors:** Danyang Chen<sup>1†</sup>, Qianqian Lou<sup>1†</sup>, Xiang-Jie Song<sup>1†</sup>, Fang Kang<sup>1</sup>, An Liu<sup>2</sup>, Changjian Zheng<sup>3</sup>, Yanhua Li<sup>1</sup>, Di Wang<sup>1</sup>, Sen Qun<sup>4</sup>, Zhi Zhang<sup>1, 5\*</sup>, Peng Cao<sup>4\*</sup>, Yan Jin<sup>4\*</sup>

1 **Supplemental figure titles and legends**

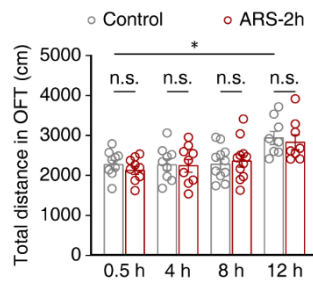

2

3 **Supplementary Fig. 1: Performance of ARS-treated mice in open field test at different**  
4 **time point.**

5 Summarized data of movement distances in central area of OFT in ARS-2h mice at 0.5 h, 4 h,  
6 8 h, and 12 h post-stress induction and corresponding control mice. Different batches of mice  
7 were used for each OFT assay (0.5 h, n = 9 mice per group; 4 h, n = 9 mice per group; 8 h, n =  
8 11 mice per group; 12 h, n = 8 mice per group;  $F_{1,66} = 0.2290$ ,  $p = 0.6338$ ). Significance was  
9 assessed by two-way repeated-measures ANOVA with post hoc comparison between groups.  
10 All data are presented as mean  $\pm$  SEM. \* $p < 0.05$ ; n.s., not significant. See also Supplementary  
11 Data 1. Source data are provided as Source Data file.

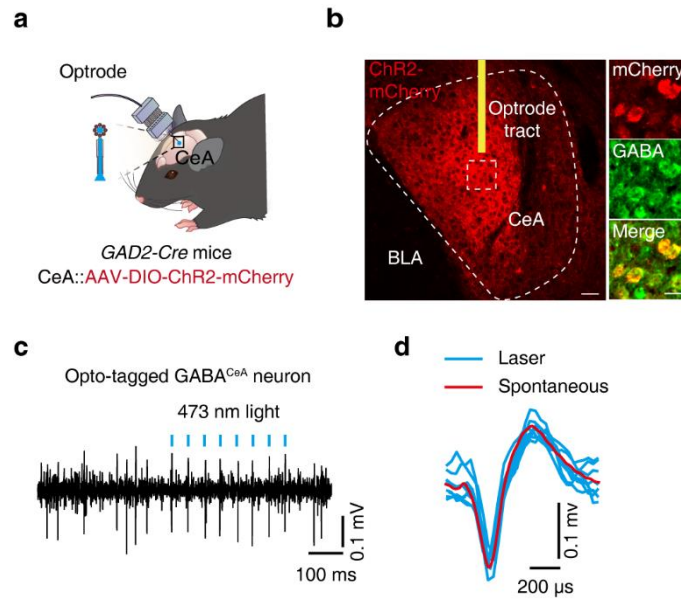

12

13 **Supplementary Fig. 2: Identification of characteristic GABA<sup>CeA</sup> neuron spike waveforms.**

14 **a**, Schematic for optogenetic tagging and electrophysiological recording. Enlarged area shows  
 15 optrodes. **b**, Representative images of virus injection site in the CeA (left) and mCherry<sup>+</sup>  
 16 neurons colocalized with immunofluorescence signal for GABAergic neurons (right). Scale  
 17 bars, 50 μm (left) and 20 μm (right). **c**, **d**, Example recording of spontaneous and light-evoked  
 18 spikes from a GABA<sup>CeA</sup> neuron (**c**) and overlay of averaged spontaneous (red) and light-evoked  
 19 (blue) spike waveforms from the example unit (**d**).

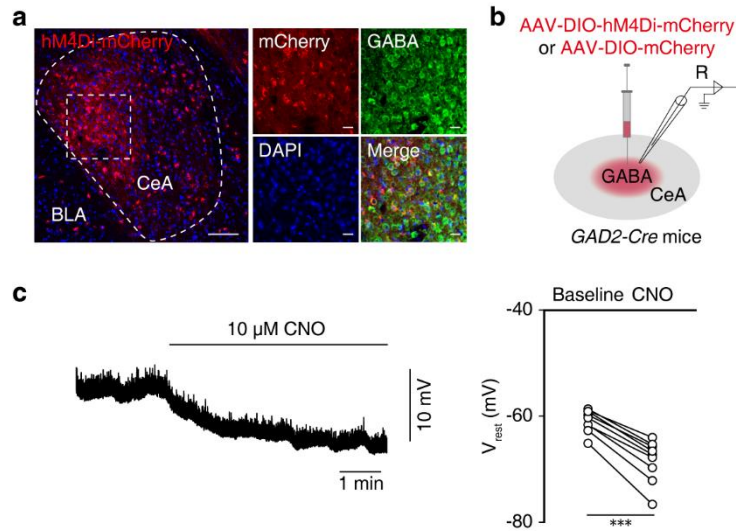

20

21 **Supplementary Fig. 3: Chemogenetic inhibition virus successfully expresses in GABA<sup>CeA</sup>**  
 22 **neurons.**

23 **a**, Representative images of CeA-injection sites (left) and mCherry-labeled neurons (red) co-  
 24 labeled with GABA immunofluorescence (right). Scale bars, 100  $\mu$ m (left) and 20  $\mu$ m (right).

25 **b**, Schematic of CeA injection of AAV-DIO-hM4Di-mCherry in *GAD2-Cre* mice and recording  
 26 configuration in acute slices. **c**, Whole-cell recordings showing the effect of CNO on AAV-

27 DIO-hM4Di-mCherry expressing GABA<sup>CeA</sup> neurons (n = 9 cells from three mice per group;  $t_8$   
 28 = 11.23,  $p < 0.001$ ). Significance was assessed by two-tailed paired Student's *t*-test in (c). All

29 data are presented as mean  $\pm$  SEM. \*\*\* $p < 0.001$ . See also Supplementary Data 1. Source data

30 are provided as Source Data file.

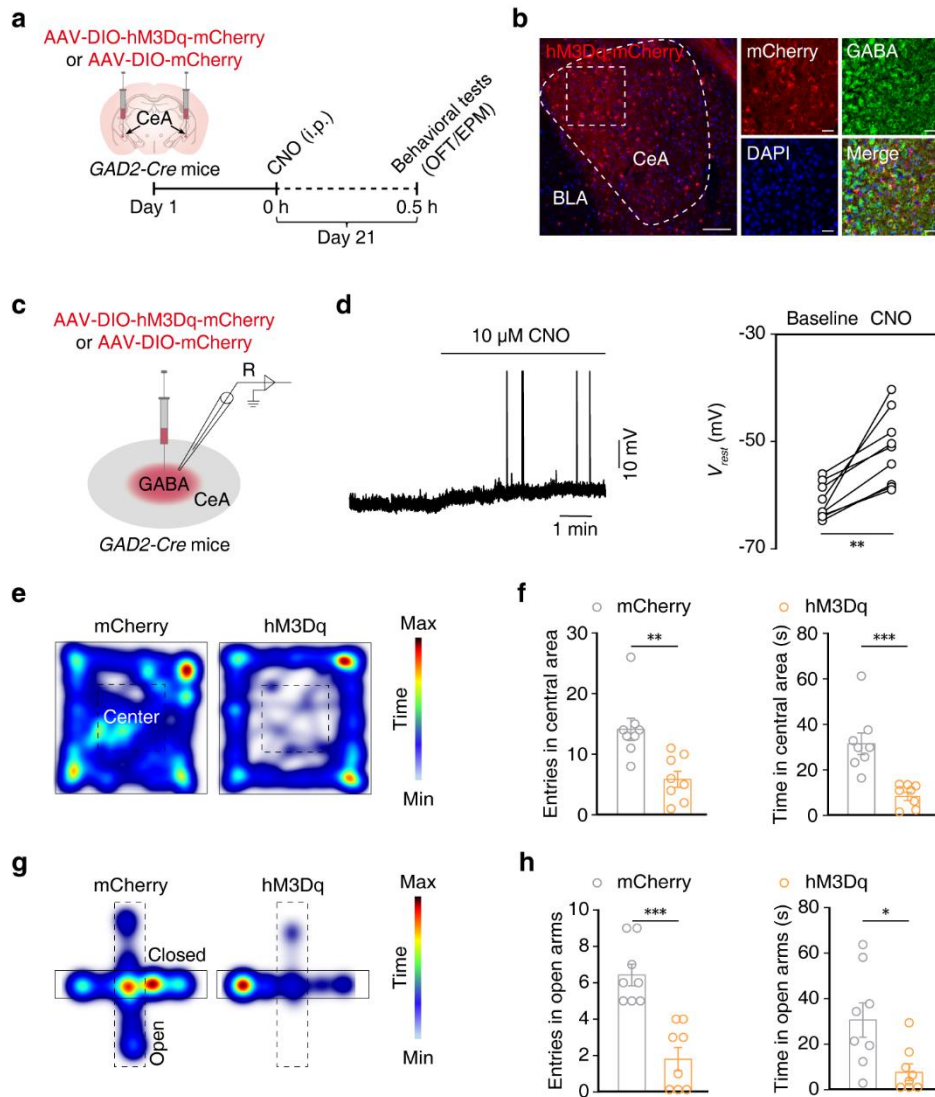

31

32 **Supplementary Fig. 4: Chemogenetic activation of GABA<sup>CeA</sup> neurons induces anxiety-like**  
 33 **behaviors in naïve mice.**

34 **a**, Experimental schematic of chemogenetic activation of GABA<sup>CeA</sup> neurons and behavioral  
 35 tests. **b**, Representative images of CeA injection sites (left) and mCherry-labeled neurons (red)  
 36 co-labeled with GABA immunofluorescence (right). Scale bars, 100  $\mu$ m (left) and 20  $\mu$ m (right).  
 37 **c**, Schematic of CeA injection of AAV-DIO-hM3Dq-mCherry in *GAD2-Cre* mice and recording  
 38 configuration in acute slices. **d**, Whole-cell recordings showing the effect of CNO on AAV-  
 39 DIO-hM3Dq-mCherry expressing GABA<sup>CeA</sup> neurons (n = 9 cells from three mice per group;  $t_8$   
 40 = 4.791,  $p = 0.0014$ ). **e, f**, Representative heatmaps of trajectories (**e**) and summarized data of  
 41 entries and the time spent in central area (**f**; left,  $t_{14} = 3.641$ ,  $p = 0.0027$ ; right,  $t_{14} = 4.559$ ,  $p =$   
 42 0.0004) of OFT (n = 8 mice per group). **g, h**, Representative heatmaps of trajectories (**g**) and  
 43 summarized data of entries and the time spent in the open arms (**h**; left,  $t_{14} = 5.286$ ,  $p = 0.0001$ ;  
 44 right,  $t_{14} = 2.730$ ,  $p = 0.0163$ ) of EPM (n = 8 mice per group). Significance was assessed by  
 45 two-tailed paired Student's  $t$ -test in (**d**), two-tailed unpaired Student's  $t$ -test in (**f, h**). All data

46 are presented as mean  $\pm$  SEM. \* $p < 0.05$ , \*\* $p < 0.01$ , \*\*\* $p < 0.001$ . See also Supplementary  
47 Data 1. Source data are provided as Source Data file.

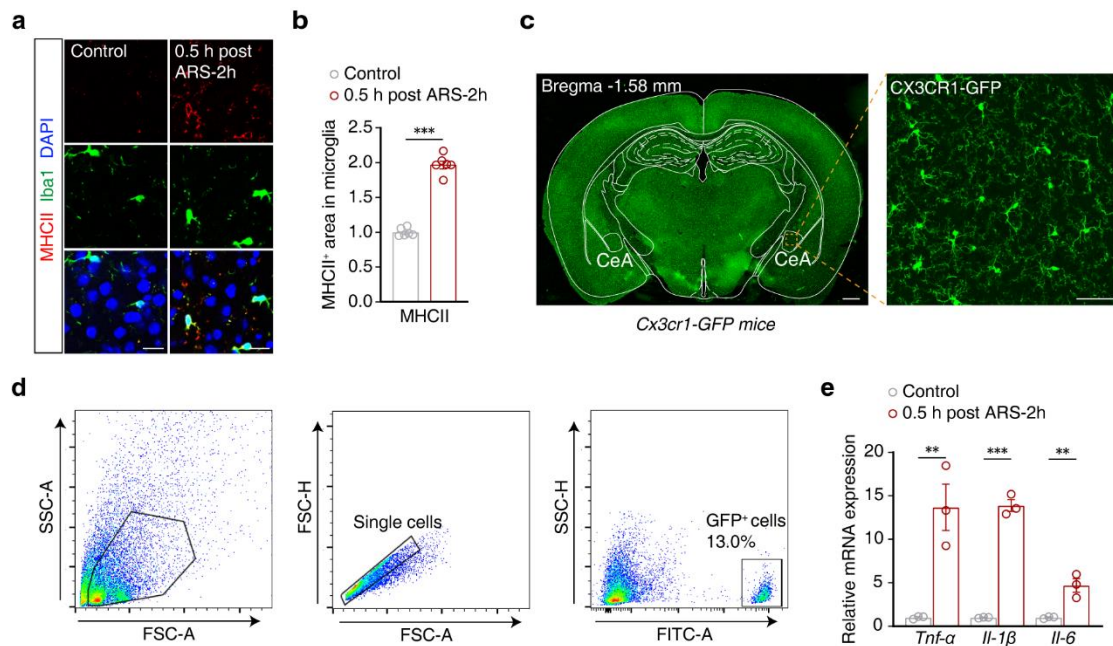

48

49

**Supplementary Fig. 5: Immunofluorescent staining for the inflammatory molecules in microglia.**

50

51 **a, b**, Representative images (**a**) and quantitative analyses (**b**) of immunostaining for MHCII  
 52 (red), Iba1 (green), and DAPI (blue) in the CeA of 0.5 h post ARS-2h and corresponding control  
 53 mice ( $n = 6$  mice per group; **b**,  $t_{10} = 7.769$ ,  $p < 0.001$ ). Scale bars, 20  $\mu\text{m}$ . **c**, Representative  
 54 images of microglia in the CeA of *Cx3cr1-GFP* mice. Scale bars, 500  $\mu\text{m}$  (left) and 50  $\mu\text{m}$   
 55 (right). **d**, Gating strategy of the cell subpopulations in the CeA GFP<sup>+</sup> microglia analyzed by  
 56 flow cytometry. **e**, qPCR analysis of *Tnf-α*, *Il-1β* and *Il-6* mRNA levels in CeA microglia of  
 57 ARS-2h and control mice ( $n = 3$  samples per group; *Tnf-α*,  $t_4 = 4.751$ ,  $p = 0.0090$ ; *Il-1β*,  $t_4 =$   
 58  $18.98$ ,  $p < 0.001$ ; *Il-6*,  $t_4 = 4.687$ ,  $p = 0.0094$ ). Significance was assessed by two-tailed unpaired  
 59 Student's *t*-test in (**b, e**). All data are presented as mean  $\pm$  SEM. \*\* $p < 0.01$ , and \*\*\* $p < 0.001$ .  
 60 See also Supplementary Data 1. Source data are provided as Source Data file.

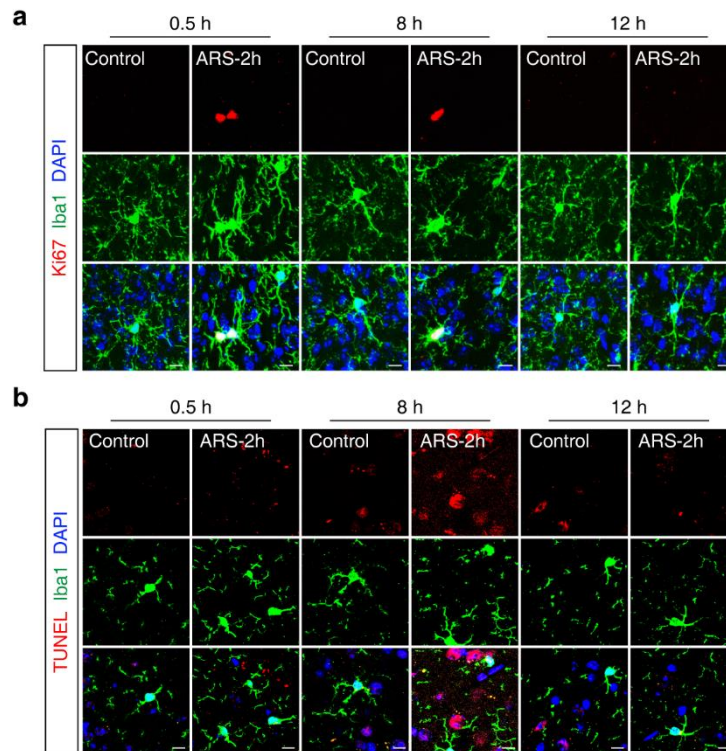

61

62 **Supplementary Fig. 6: Immunofluorescence staining for Ki67 and TUNEL assays**  
 63 **following ARS-2h treatment in mice.**

64 **a**, Representative images of immunostaining for Ki67 (red), Iba1 (green), and DAPI (blue) in  
 65 the CeA of ARS-2h and control mice at 0.5 h/8 h/12 h post-stress induction. Scale bars, 10  $\mu$ m.

66 **b**, Representative images TUNEL assays; fragmented DNA (red), Iba1 (green), and DAPI (blue)  
 67 in the CeA of ARS-2h and control mice at 0.5 h/8 h/12 h post-treatment. Scale bars, 10  $\mu$ m.



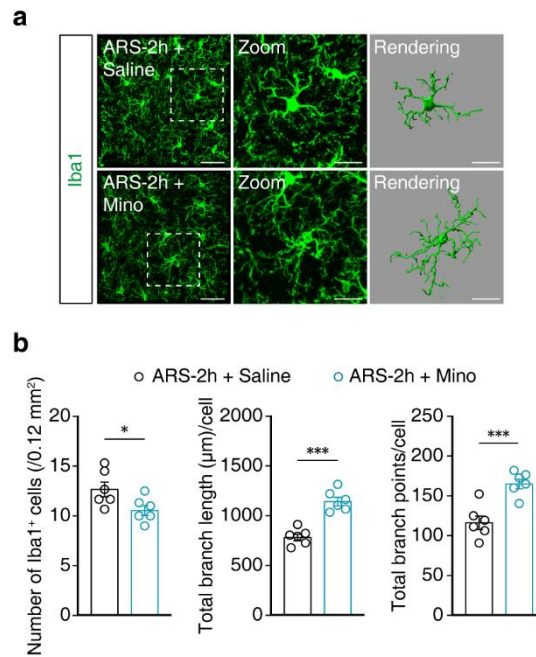

68

69 **Supplementary Fig. 7: Minocycline inhibits acute stress-induced microglial activation in**  
 70 **the CeA.**

71 **a**, Representative images of Iba1 immunostaining and 3D reconstruction of microglia in the  
 72 CeA from ARS-2h mice pre-treated with saline or Mino. Scale bars, 40 µm (overview) and 20  
 73 µm (inset and rendering). **b**, Quantification of Iba1<sup>+</sup> cell numbers, total process length, and  
 74 number of branch points of microglia in the CeA from ARS-2h mice pre-treated with saline or  
 75 Mino (n = 6 mice per group; left,  $t_{10} = 2.360$ ,  $p = 0.04$ ; middle,  $t_{10} = 6.729$ ,  $p < 0.001$ ; right,  $t_{10}$   
 76 = 4.672,  $p = 0.0009$ ). Significance was assessed by two-tailed unpaired Student's *t*-test in (**b**).  
 77 All data are presented as mean ± SEM. \* $p < 0.05$ , \*\*\* $p < 0.001$ ; n.s., not significant. See also  
 78 Supplementary Data 1. Source data are provided as Source Data file.

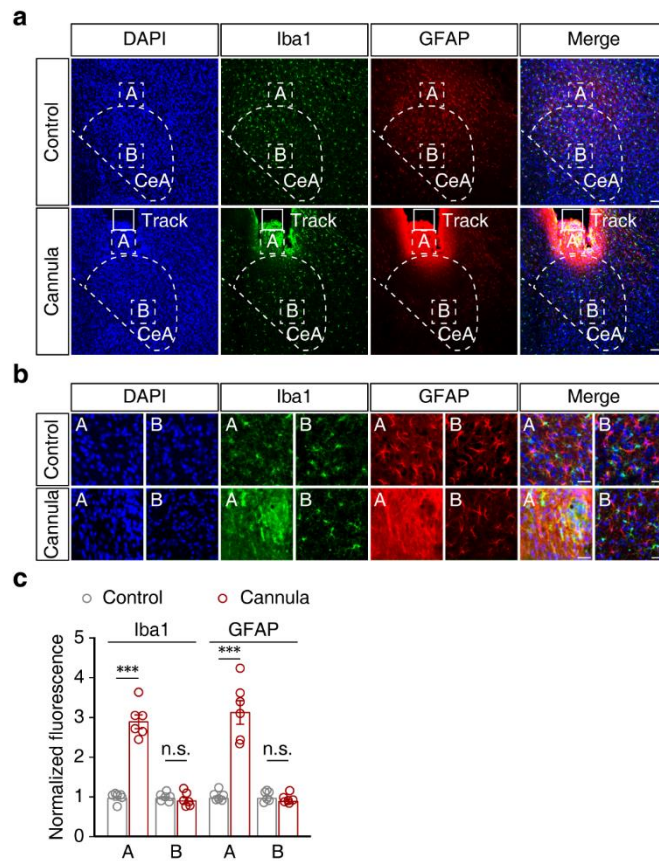

79

80 **Supplementary Fig. 8: Immunofluorescent staining of gliosis in the CeA and adjacent**  
 81 **regions of naïve mice with or without cannular implantation.**

82 **a, b**, Representative image (**a**) and enlarged image (**b**) of immunostaining for Iba1 and GFAP  
 83 around the cannula position in the CeA of implanted mice and the same position in control mice.  
 84 Scale bars, 100  $\mu\text{m}$  (**a**) and 20  $\mu\text{m}$  (**b**). **c**, Quantitative analyses of immunostaining for Iba1 and  
 85 GFAP in (**b**) ( $n = 6$  mice per group; Iba1,  $F_{1,20} = 89.37$ ,  $p < 0.0001$ ; GFAP,  $F_{1,20} = 46.00$ ,  $p <$   
 86  $0.001$ ). Significance was assessed by two-way repeated-measures ANOVA with post hoc  
 87 comparison between groups in (**c**). All data are presented as mean  $\pm$  SEM. \*\*\* $p < 0.001$ ; n.s.,  
 88 not significant. See also Supplementary Data 1. Source data are provided as Source Data file.

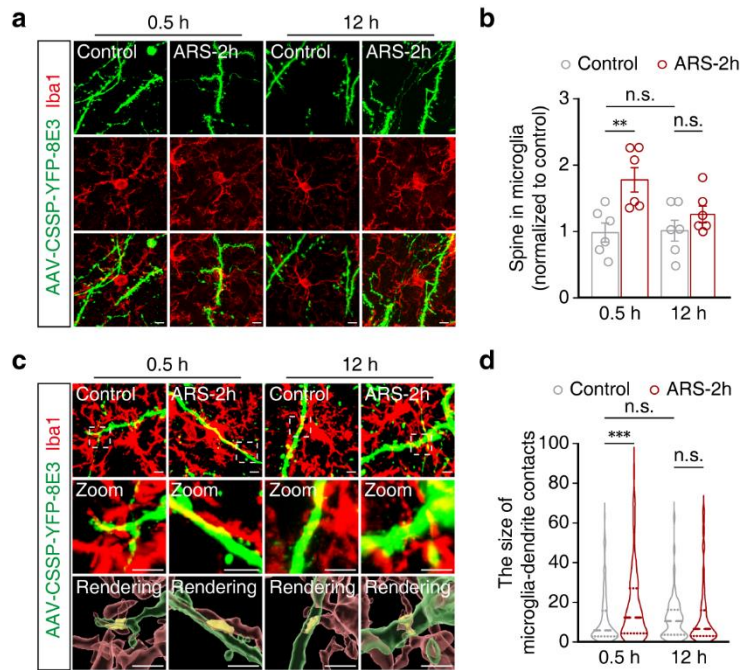

89

90 **Supplementary Fig. 9: Acute stress increases the size of microglia-dendrite contacts in the**  
 91 **CeA.**

92 **a, b**, Reconstructed images (**a**) and summarized data (**b**) for the number of microglia-dendritic  
 93 spines of Iba1<sup>+</sup> microglia (red) containing YFP<sup>+</sup> neuronal dendritic spines in the CeA from  
 94 corresponding control or 0.5 h/12 h post-stress induction mice (n= 6 mice per group;  $F_{1,20} =$   
 95 11.76,  $p = 0.0027$ ). Scale bars, 5  $\mu\text{m}$ . **c, d**, Reconstructed images (**c**) and summarized data (**d**)  
 96 for the size of microglia-dendrite contacts of Iba1<sup>+</sup> microglia (red) and YFP<sup>+</sup> neuronal dendrites  
 97 in the CeA from control or 0.5 h/12 h post-stress induction mice (0.5 h control, n = 128 cells  
 98 from six mice; 0.5 h post ARS-2h, n = 126 cells from six mice; 12 h control, n = 124 cells from  
 99 six mice; 12 h post ARS-2h, n = 123 cells from six mice;  $F_{1,497} = 7.912$ ,  $p = 0.0051$ ). Scale bars,  
 100 10  $\mu\text{m}$  (overview) and 5  $\mu\text{m}$  (inset and rendering). Significance was assessed by two-way  
 101 repeated-measures ANOVA with post hoc comparison between groups in (**b, d**). All data are  
 102 presented as mean  $\pm$  SEM. \*\* $p < 0.01$ , \*\*\* $p < 0.001$ ; n.s., not significant. See also  
 103 Supplementary Data 1. Source data are provided as Source Data file.

104

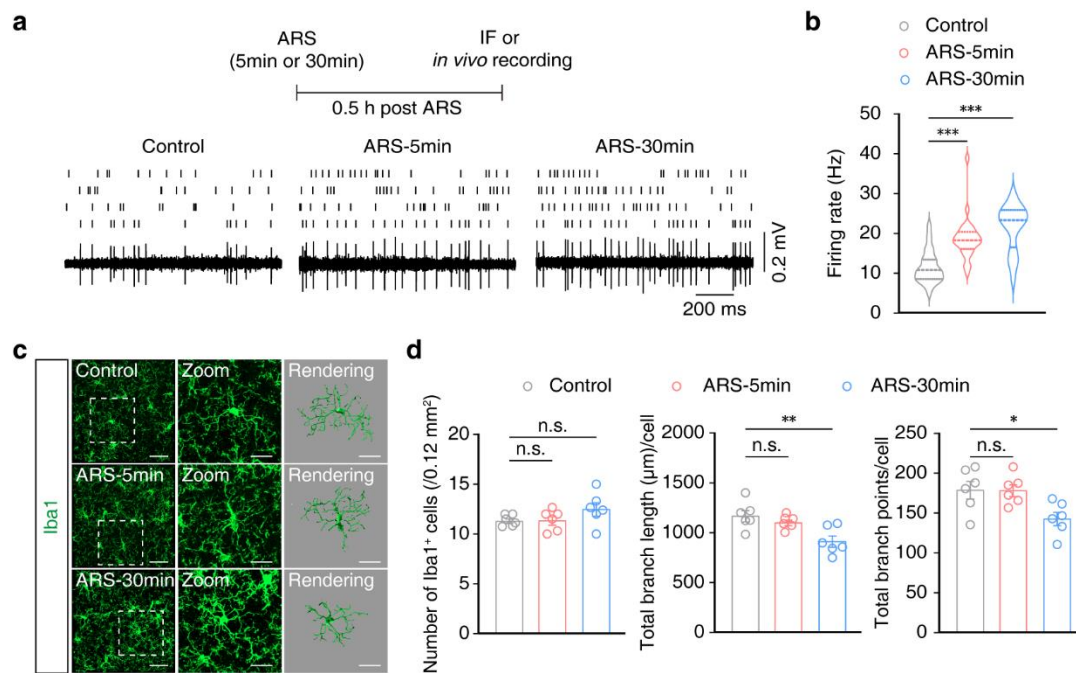

105

106 **Supplementary Fig. 10: Activation of GABA<sup>CeA</sup> neurons precedes microglial activation in**  
 107 **stress mice.**

108 **a**, Experimental schematic of ARS-treated mice (top). Raster plots and typical traces (bottom)  
 109 of the spontaneous firings of GABA<sup>CeA</sup> neurons in control and ARS-treated mice. **b**, Summary  
 110 data of firing rate of GABA<sup>CeA</sup> neurons in control and ARS-treated mice (n = 28 cells from six  
 111 mice per group;  $F_{2,81} = 28.17$ ,  $p < 0.001$ ). **c**, Representative images of Iba1 immunostaining and  
 112 3D reconstruction of microglia in the CeA of control and ARS-treated mice. Scale bars, 40 μm  
 113 (overview) and 20 μm (inset and rendering). **d**, Quantification of Iba1<sup>+</sup> cell numbers, total  
 114 process length, and the number of branch points of microglia in the CeA from control and ARS-  
 115 treated mice (n = 6 mice per group; left,  $F_{2,15} = 2.028$ ,  $p = 0.1662$ ; middle,  $F_{2,15} = 7.389$ ,  $p =$   
 116  $0.0058$ ; right,  $F_{2,15} = 5.137$ ,  $p = 0.02$ ). Significance was assessed by one-way ANOVA with  
 117 post hoc comparison between groups in (**b**, **d**). All data are presented as mean ± SEM. \* $p <$   
 118  $0.05$ , \*\* $p < 0.01$ , \*\*\* $p < 0.001$ ; n.s., not significant. See also Supplementary Data 1. Source  
 119 data are provided as Source Data file.

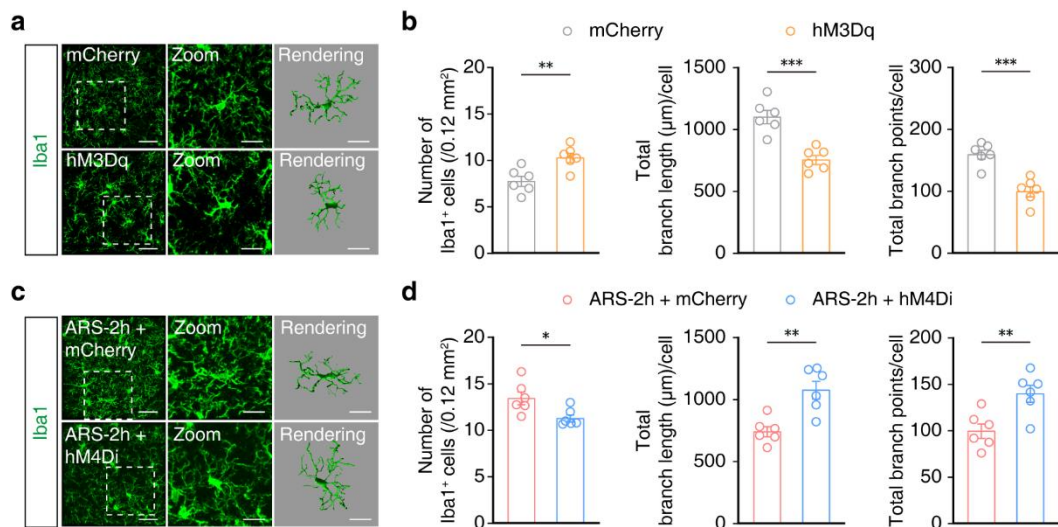

120

121 **Supplementary Fig. 11: Microglial activation is abolished by chemogenetic inhibition of**  
 122 **GABA<sup>CeA</sup> neurons in acute stress mice.**

123 **a, b**, Representative images of Iba1 immunostaining and 3D reconstruction of microglia (**a**) and  
 124 quantification of Iba1<sup>+</sup> cell numbers, total process length, and the number of branch points of  
 125 microglia (**b**; left,  $t_{10} = 3.475$ ,  $p = 0.006$ ; middle,  $t_{10} = 5.351$ ,  $p = 0.0003$ ; right,  $t_{10} = 5.394$ ,  $p =$   
 126  $0.0003$ ) in the naïve mice infected with mCherry or hM3Dq-mCherry within the CeA ( $n = 6$   
 127 mice per group). Scale bars, 40 μm (overview) and 20 μm (inset and rendering). **c, d**,  
 128 Representative images of Iba1 immunostaining and 3D reconstruction of microglia (**c**) and  
 129 quantification of Iba1<sup>+</sup> cell numbers, total process length, and the number of branch points of  
 130 microglia (**d**; left,  $t_{10} = 2.754$ ,  $p = 0.0204$ ; middle,  $t_{10} = 4.062$ ,  $p = 0.0023$ ; right,  $t_{10} = 3.365$ ,  $p$   
 131  $= 0.0072$ ) in the ARS-2h mice infected with mCherry or hM4Di-mCherry within the CeA ( $n =$   
 132  $6$  mice per group). Scale bars, 40 μm (overview) and 20 μm (inset and rendering). Significance  
 133 was assessed by two-tailed unpaired Student's *t*-test in (**b, d**). All data are presented as mean ±  
 134 SEM. \* $p < 0.05$ , \*\* $p < 0.01$ , \*\*\* $p < 0.001$ . See also Supplementary Data 1. Source data are  
 135 provided as Source Data file.

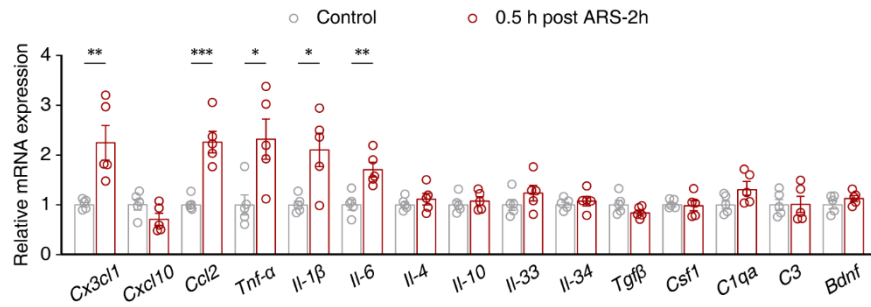

136

137 **Supplementary Fig. 12: Expression of inflammatory molecules in the CeA of ARS-2h mice.**

138 qPCR analysis of mRNA levels of cytokines, chemokines, complement proteins, and growth

139 factors in the CeA of ARS-2h mice (n = 5 mice per group; *Cx3cl1*,  $t_8 = 3.540$ ,  $p = 0.0076$ ; *Ccl2*,

140  $t_8 = 5.608$ ,  $p = 0.0005$ ; *Tnf-α*,  $t_8 = 2.920$ ,  $p = 0.0193$ ; *Il-1β*,  $t_8 = 3.170$ ,  $p = 0.0132$ ; *Il-6*,  $t_8 =$

141  $3.892$ ,  $p = 0.0046$ ). Significance was assessed by two-tailed unpaired Student's *t*-test. All data

142 are presented as mean ± SEM. \* $p < 0.05$ , \*\* $p < 0.01$ , \*\*\* $p < 0.001$ . See also Supplementary

143 Data 1. Source data are provided as Source Data file.

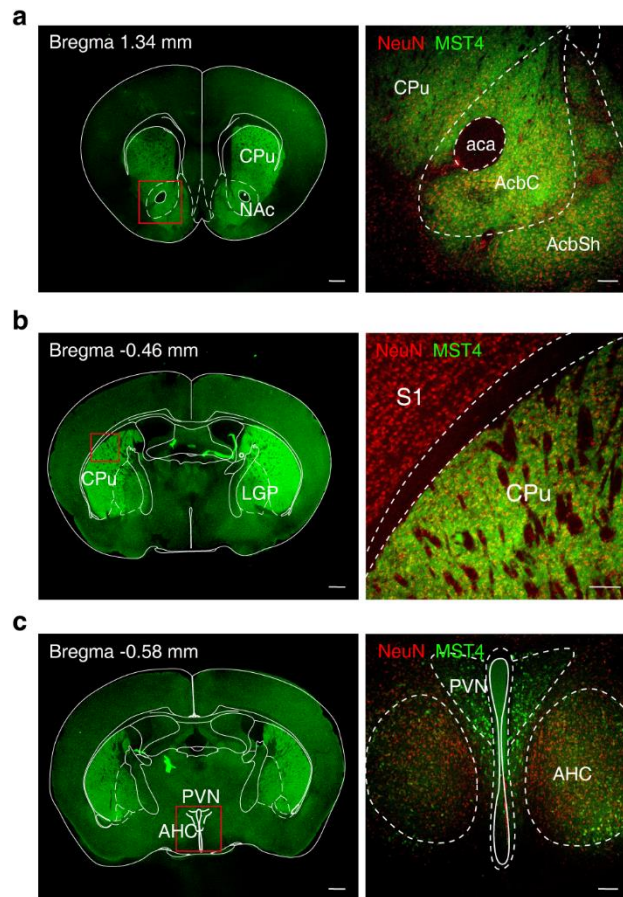

144

145 **Supplementary Fig. 13: MST4 expression profile in the mouse brain.**

146 **a-c**, Immunofluorescence staining showing the colocalization of MST4 (green) and neurons

147 (red) in different brain regions from naïve mice, including the accumbens nucleus (NAc, **a**),

148 caudate putamen (CPu, **b**), paraventricular hypothalamic nucleus (PVN, **c**). Scale bars, 500 μm

149 (left) and 100 μm (right).

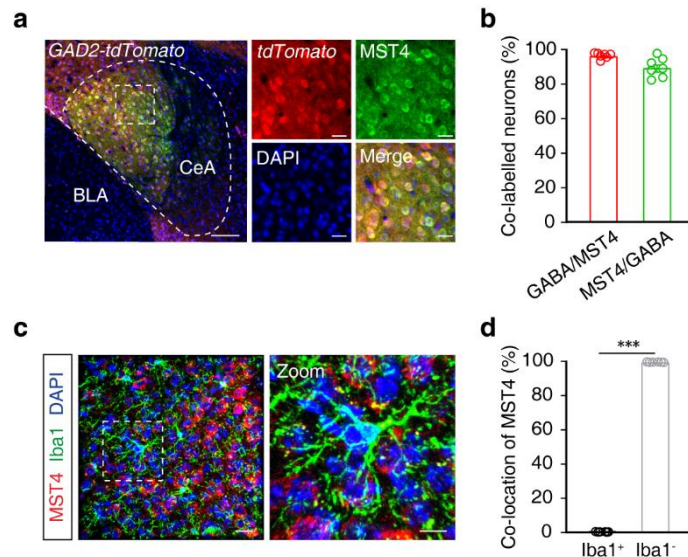

150

151 **Supplementary Fig. 14: MST4 is expressed in GABA<sup>CeA</sup> neurons but not in microglia.**

152 **a**, Images showing co-localization of MST4-positive neurons (green) with Tdtomato<sup>+</sup> neurons  
 153 (red). Scale bars, 100  $\mu$ m (left) and 20  $\mu$ m (right). **b**, Summary data showing the percentage of  
 154 MST4-positive neurons expressing GABA and GABA-positive neurons expressing MST4 in  
 155 the CeA from *GAD2-tdTomato* mice (n = 7 mice per group). **c**, Representative  
 156 microphotographs of double immunofluorescence staining of MST4 and Iba1<sup>+</sup> microglia in the  
 157 CeA. Scale bars, 20  $\mu$ m (left) and 10  $\mu$ m (right). **d**, Percentage data showing that Iba1<sup>+</sup> microglia  
 158 within the CeA were not colocalized with MST4 immunofluorescence (n = 6 mice per group;  
 159  $t_{10} = 1488$ ,  $p < 0.001$ ). Significance was assessed by two-tailed unpaired Student's *t*-test in (**d**).  
 160 All data are presented as mean  $\pm$  SEM. \*\*\* $p < 0.001$ . See also Supplementary Data 1. Source  
 161 data are provided as Source Data file.

162



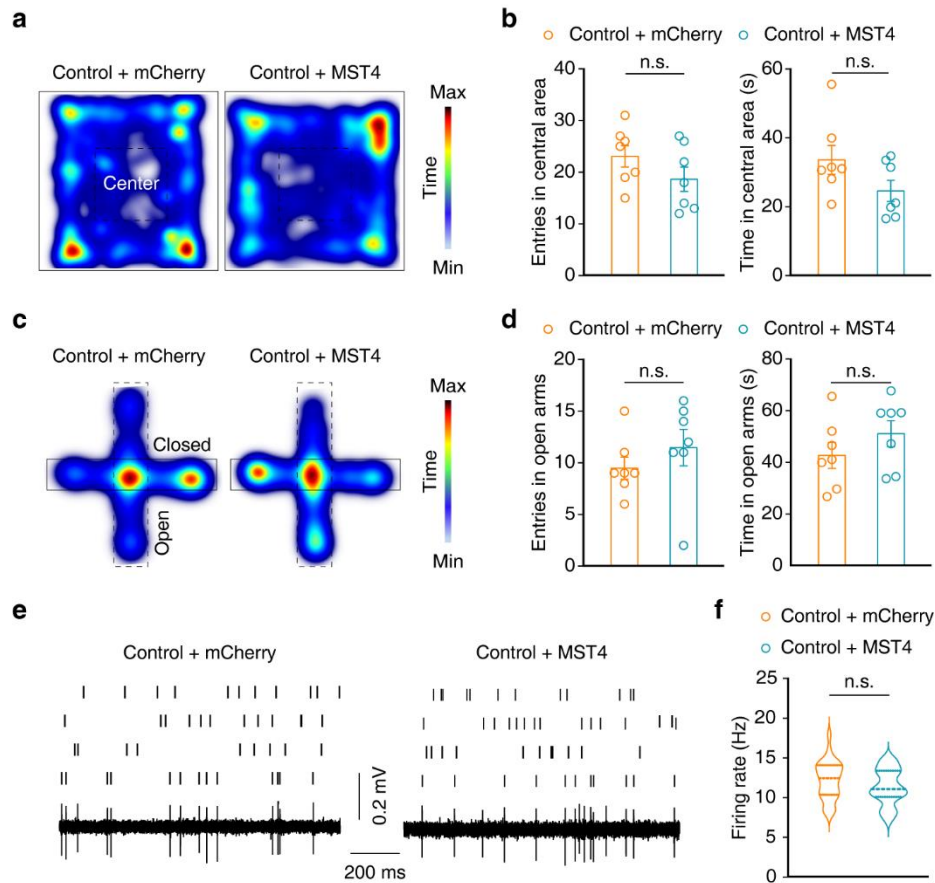

163

164 **Supplementary Fig. 15: MST4 overexpression in the CeA does not affect anxiety-like**  
 165 **behaviors in naïve mice.**

166 **a, b**, Representative exploration traces (**a**) and summarized data of entries and the time spent in  
 167 central area (**b**) of OFT from naïve mice infected with AAV-mCherry and AAV-MST4 (n = 7  
 168 mice per group). **c, d**, Representative exploration traces (**c**) and summarized data of entries and  
 169 the time spent in the open arms (**d**) of EPM from naïve mice treated with AAV-mCherry and  
 170 AAV-MST4 (n = 7 mice per group). **e, f**, Raster plots and typical traces (**e**) and the quantitative  
 171 data (**f**) of the spontaneous firings of GABA<sup>CeA</sup> neurons in naïve mice infected with AAV-  
 172 mCherry and AAV-MST4 (n = 30 cells from six mice per group). Significance was assessed  
 173 by two-tailed unpaired Student's *t*-test in (**b, d, f**). All data are presented as mean ± SEM. n.s.,  
 174 not significant. See also Supplementary Data 1. Source data are provided as Source Data file.

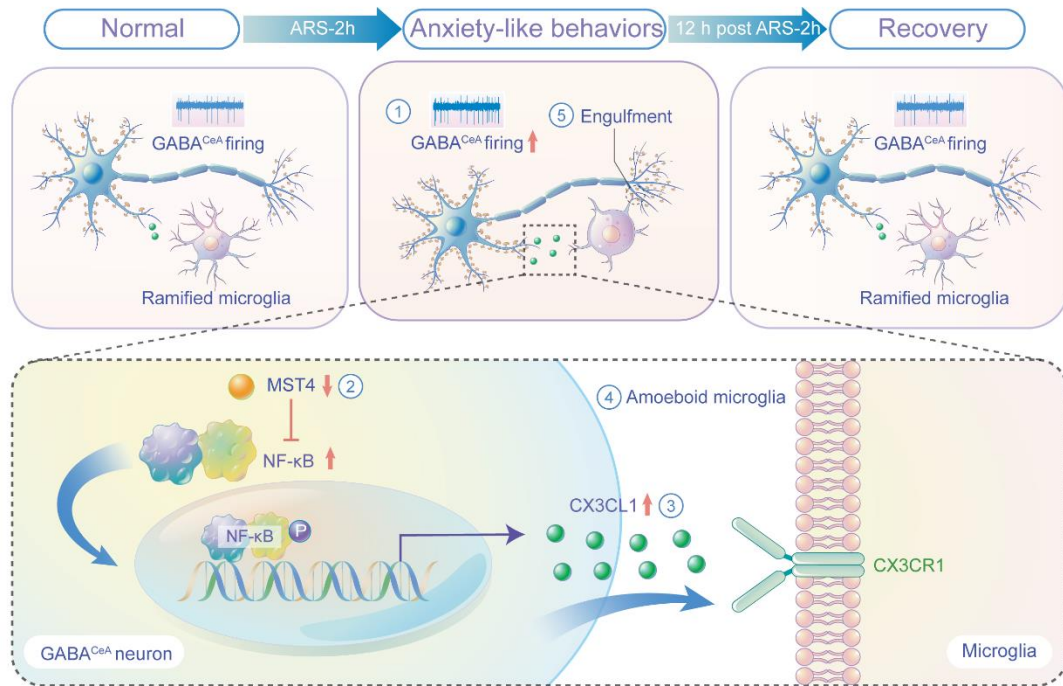

175

176 **Supplementary Fig. 16: Microglial engulfment of dendritic spines promotes the extinction**  
 177 **of acute stress-induced anxiety-like behaviors.**

178 Anxiety-like behaviors following acute restraint are relieved within 12 hours after stress  
 179 induction in male mice. Suppression of NF- $\kappa$ B by MST4 stimulates production of CX3CL1 by  
 180 GABA<sup>CeA</sup> neurons, which increases under acute restraint stress and subsequently activates  
 181 microglia in the CeA, promoting engulfment of dendritic spines. Microglial engulfment of  
 182 dendritic spines in the CeA leads to feedback inhibition that attenuates GABA<sup>CeA</sup> neuronal  
 183 hyperactivity, restoring them to non-stress levels and leading to extinction of anxiety-like  
 184 behaviors.
