# Supplementary material for: Microglia govern the extinction of acute stress-induced anxiety-like behaviors in male mice
Source: PubMed Central journal article supplement (PMC10781988; doi:10.1038/s41467-024-44704-6), 2024-01-10
Supplement: 41467_2024_44704_MOESM2_ESM.pdf [file 41467_2024_44704_MOESM2_ESM.pdf]

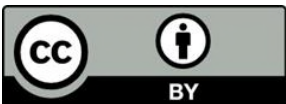

**Open Access** This file is licensed under a Creative Commons Attribution 4.0 International License, which permits use, sharing, adaptation, distribution and reproduction in any medium or format, as long as you give appropriate credit to the original author(s) and the source, provide a link to the Creative Commons license, and indicate if changes were made. In the cases where the authors are anonymous, such as is the case for the reports of anonymous peer reviewers, author attribution should be to 'Anonymous Referee' followed by a clear attribution to the source work. The images or other third party material in this file are included in the article's Creative Commons license, unless indicated otherwise in a credit line to the material. If material is not included in the article's Creative Commons license and your intended use is not permitted by statutory regulation or exceeds the permitted use, you will need to obtain permission directly from the copyright holder. To view a copy of this license, visit <http://creativecommons.org/licenses/by/4.0/>.

## REVIEWER COMMENTS

### Reviewer #1 (Remarks to the Author):

The study by Chen et al has provided multiple lines of evidence showing that the extinction of acute stress-induced anxiety is controlled by microglia activation, which is caused by elevated CeAGABA neuronal CX3CL1 secretion via MST4-NFκB signaling. Activated microglia in turn inhibit CeAGABA neuronal activity via the engulfment of dendritic spines, leading to the extinction of anxiety-like behaviors induced by restraint stress. These results have provided an interesting mechanism on neuron-microglia interactions, which may contribute to the maintenance of brain homeostasis. While technical strengths are impressive, a few major concerns on experimental procedures raise concerns on the validity of results and interpretations.

1. Timeline of events. Fig. 1, anxiety and CeAGABA neuronal activity are increased at 8hrs post-ARS, but not 12hrs post-ARS. What triggers the dramatic changes within just 4 hrs? CX3CL1 secretion, microglia activation, and engulfment of dendritic spines of CeAGABA neurons all happened within the last 4 hrs?

2. Behavioral assays. Subsequent EPM tests usually significantly affect (reduce) the animals' "anxiety" measurements (time and entries in open arms) of prior EPM tests. Repeated EPM tests at close intervals (0.5h, 4h, 8h, 12h) of the same animals are highly problematic (Fig. 1d, e). The heatmaps (Fig. 1d) show no or little time on open-arm at 0.5-8hr post-ARS, and a striking reversal at 12hr post-ARS, which is not very representative of the statistics (Fig. 1e). Repeated OFT tests may have similar problems.

3. Timing of tests. Many comparison experiments were carried out with a 12hr interval (0.5h vs. 12h post-ARS), which means that these measurements were conducted at the time points that mice have significantly different levels of activity. This could significantly affect the behavioral, in vivo electrophysiological and maybe even immunocytochemical results.

4. Intracranial microinfusion. Fig. 2 used cannular implantation to mouse CeA for minocycline (microglial inhibitor) injection. Guide cannula usually causes a large lesion of the implanted area, which could trigger microglia activation. Although ACSF injection is used as a control here, the effect of minocycline could be due to microglia activation by lesion rather than 2hr restraint stress. When was the multichannel electrode implanted? Was CeA examined after cannular injection for tissue integrity?

5. The increase of CX3CL1 secretion at 0.5hr post-ARS (Fig. 4b) is not compelling. It is also puzzling how CX3CL1 mRNA could be increased by 2hr ARS (Fig. 4a).

6. The data with JMS-17-2 (CX3CR1 antagonist) used i.p. injections for microglia and spine measurements and local (cannular) injections for behavioral and electrophysiological experiments, why were the different routes of injections used? When was the multichannel electrode implanted?

7. Fig. 5. The justification of examining the participation of MST4 is very weak (line 260-262). NFκB can be regulated by many molecules other than MST4. The involvement of NFκB lacks solid evidence. To more convincingly demonstrate the role of MST4 in anxiety extinction, the level of MST4 at 12h post ARS, as well as the effect of MST4 on CX3CL1 secretion, needs to be examined.

Reviewer #2 (Remarks to the Author):

Chen et al, authors of the manuscript, "Microglia govern extinction of acute stress-induced anxiety" present data that indicate neuron-microglia interactions are important mediators of behavioral responses following acute restraint stress. This is an interesting paper with several cutting-edge approaches used to demonstrate microglia may contribute to observed neurobiological and behavioral outcomes. Despite this, there are concerns about data interpretation and limitations of experimental approaches detract from the impact of this work. This work is likely to be of interest to the broad readership of Nature Communications, but the points outlined below should be addressed prior to publication.

Main points:

1) The initial data demonstrate that stress-induced activation of CeA GABA neurons is related to and sufficient to modulate behavioral responses to acute restraint stress. This raises the question as to why the authors wanted to add microglia, and not other non-neuronal cell types, into this model. Specifically, why are microglia uniquely suited to regulate this response? Perhaps this can be discussed.

2) One major concern is the interpretation of behavioral tests, in this case the OPT and EPM. Traditionally these tests were considered measures of 'anxiety-like behavior'. However, it is accepted now that rodent models do not recapitulate the complexity of psychiatric disorders, such as anxiety disorders. The behavioral outcomes reflect domains relevant to psychiatric disorders but it is not entirely clear how this relates to clinical cases. It is recommended that the authors limit use of 'anxiety-like behavior'. It would be more suitable to report this as changes in exploratory behavior or aversion to

novel environments. Either way the authors should report the specific outcomes (i.e., decreased time in center or open arms) and then describe the potential significance in the Conclusion.

3) Related to behavioral testing it is unclear if mice were repeatedly tested in Fig.1b-e. This is important as rodents will adapt their responses after exposure to a novel environment.

4) Density and morphological features of microglia is not sufficient to determine their functional state. Just based on immunohistology results it is unclear if these cellular responses are related to increased neuroinflammation or an alternate phenotype. It is recommended that further molecular or cellular characterization be performed.

5) It is intriguing that microglia density in the BLA particularly, fluctuates over such short time frames. Prior studies indicate that microglia turnover and proliferation is low (in the absence of injury). The authors should validate these changes in density with markers for proliferation or cell death.

6) Minocycline should not be considered an inhibitor of microglia. Since it was administered centrally it is likely influences molecular and cellular pathways in multiple cell types. As such, the authors should temper their conclusions regarding this approach.

7) In Fig.3, it appears that dendritic segments were used as individual samples. This is not appropriate, because dendritic segments from one mouse should not be considered independent samples. Segments from each mouse should be averaged to generate a cumulative average and then statistical analyses should be carried out on these samples. As is, the sample size artificially increases the statistical power and over-estimates group differences.

8) There are other concerns about the immunohistology in Fig.3. First, the CD68 immunolabeling seems particularly intense at the 0.5 h timepoint. Enlarged images should be presented to validate co-localization with IBA1. Second, immunohistology and 3D image analyses are used to suggest that microglia are engulfing GABA neuron structures (GAD65/67). The authors have rendered the synaptic markers and other puncta (i.e., colored 'nodes'), and it is recommended that these manipulations be removed. Moreover, these results are questionable as it appears that even in control mice there is an unusually high number of inclusions in microglia. This is further exaggerated in mice exposed to acute restraint. The authors need to reassess the specificity of their antibodies and their thresholds for image analyses. Also any engulfed synaptic structures should be within lysosomes, so the authors should validate these inclusions with CD68 immunolabeling. Finally, it is not clear how this data was quantified and 'normalized' in Fig.3I. Again individual cells should be considered independent samples.

9) The connection between stress-induced neuronal activity in the BLA and CX3CL1 signaling is not apparent. There are several neuroimmune signaling pathways altered by changes in neuronal activity. More rationale and supporting data for focusing on CX3CL1 should be provided. Also CX3CL1 is a chemokine, not a pro-inflammatory cytokine, which should be corrected throughout the manuscript.

10) Beyond the rationale for targeting CX3CL1 there is an issue with interpretation of results in Fig.4g-l. Significant differences are not reported for vehicle controls at 0.5 and 12 hours on all the outcomes. This limits interpretation and does not support the conclusion that targeting CX3CL1 signaling with JM-17-2 and microglia are involved in the observed neurobiological, behavioral, or neurophysiological effects.

11) Related to the point above, it is unclear how MST4 was connected to CX3CL1 signaling in the brain. It is recommended that primary data in extended figures showing MST4 localization in neurons be included in the main figures. This is important as it provides direct evidence that targeted molecules are expressed in cells of interest. As described MST4 is an important regulator of NF- $\kappa$ B signaling. In this context, you would expect that it would influence other cytokines and chemokines. It is recommended that other molecular targets including IL-1b, IL-6, and TNF $\alpha$  be examined.

12) Several figures lack comprehensive statistical analyses. As noted, some important group differences are not reported and this limits data interpretation.

Other points:

- Studies used only male mice. This should be emphasized in the Results and Discussion.

- Sample sizes (as in the # of mice used) should be reported in figure legends.

- The summary figure in Extended Data is simplified and better suited for a review manuscript. It is recommended that it be removed.

Reviewer #3 (Remarks to the Author):

In this manuscript, Chen et al. investigates a novel role of microglia. The immediate behavioral outcome of an acute stress is a somewhat understudied element of the stress response. Chen et al. highlight the role of central amygdala inhibitory neurons in controlling anxiety-like behaviors following stress. They propose that microglia play a crucial role in the behavioral recovery via the engulfment of dendritic spines. The authors reveal the pathway necessary for the activation of microglia by inhibitory CeA neurons.

Overall, I find the manuscript very interesting and novel and was particularly impressed with the rigor with which the experiments seemed to be conducted and analyzed. The concerns I have are primarily related to the terminology and interpretation of the behavioral results.

1) Traditionally the term 'extinction' is a learning process where the repeated exposure to a cue without reinforcement/punishment leads to the fading of a behavior. In the manuscript, the behavioral analysis is not based on cue triggered behaviors nor repeated exposures. I believe the consistent use of a different term describing the fading or disappearance of the behavioral state evoked by acute stress would be very beneficial.

2) The authors should show the distance data collected during open field or elevated plus maze exposures to make the claim that the behaviors reported are indeed anxiety-like and not just the results of decreased locomotion.

3) The identification of inhibitory neurons during multi-channel recordings is challenging even with optogenetical tagging. The authors claim in the results section that in vivo multielectrode recordings showed an increase in the activity of CeA inhibitory. How can they be sure if in the methods section only 'putative CeA GABA' is mentioned? What is the reference for the identification?

Typo: throughout the paper it says 'Extended Date Fig.' instead of Extended Data Fig.

1 **Response to referees**

2

3 **Manuscript ID:** NCOMMS-23-10335A

4 **Title:** Microglia govern the fading of acute stress-induced anxiety

5

6 We sincerely appreciate the positive and helpful evaluation from the editor and Reviewers. In  
7 light of these thoughtful critiques, we have performed additional experiments to address the  
8 specific concerns. We have also substantially revised the manuscript and incorporated these  
9 suggestions and comments into the revised manuscript. The revised version of our study with  
10 tracked changes ([highlighted in blue](#)) has been uploaded as a separate file. Detailed changes  
11 and our point-by-point responses to Reviewers' questions are presented below.

12

13 **Contents:**

14 Response to Reviewer 1: Page 2-14

15 Response to Reviewer 2: Page 15-27

16 Response to Reviewer 3: Page 28-31

17 **Reviewers' Comments:**

18 **Reviewer #1:**

19 The study by Chen et al has provided multiple lines of evidence showing that the extinction of  
20 acute stress-induced anxiety is controlled by microglia activation, which is caused by elevated  
21 CeA<sup>GABA</sup> neuronal CX3CL1 secretion via MST4-NFκB signaling. Activated microglia in turn  
22 inhibit CeA<sup>GABA</sup> neuronal activity via the engulfment of dendritic spines, leading to the  
23 extinction of anxiety-like behaviors induced by restraint stress. These results have provided an  
24 interesting mechanism on neuron-microglia interactions, which may contribute to the  
25 maintenance of brain homeostasis. While technical strengths are impressive, a few major  
26 concerns on experimental procedures raise concerns on the validity of results and  
27 interpretations.

28

29 1. Timeline of events. Fig. 1, anxiety and CeA<sup>GABA</sup> neuronal activity are increased at 8hrs post-  
30 ARS, but not 12hrs post-ARS. What triggers the dramatic changes within just 4 hrs? CX3CL1  
31 secretion, microglia activation, and engulfment of dendritic spines of CeA<sup>GABA</sup> neurons all  
32 happened within the last 4 hrs?

33 **Response:** First, we would like to thank the Reviewer for their positive review of our work and  
34 insightful guidance towards improving our study.

35 To address this concern, we conducted new experiments to characterize the timeline of  
36 dynamic changes in CX3CL1 secretion, microglial activity, and dendritic spines of CeA<sup>GABA</sup>  
37 neurons at 8 h post treatment in ARS-2h mice. Our findings in the original manuscript have  
38 shown that dendritic spine number of CeA<sup>GABA</sup> neurons significantly increases at 0.5 h post-  
39 ARS-2h, suggesting a higher rate of spine formation than elimination rate. By contrast, we now  
40 found that the number of dendritic spines at 8 h post ARS-2h treatment was less than that at 0.5  
41 h post treatment, suggesting that the rate of dendritic spine formation decelerated with time post  
42 stress induction (please see Response Document Figure 1a, b, and also see new Figure 3b, c).  
43 These results indicate that the process of spine formation at progressively slower rates  
44 continued until the microglia engulfment activity returned to normal levels, consistent with  
45 results that showed dendritic spine number at 12 h post ARS-2h was not significantly different  
46 from that in the control group (please see original Figure 2b, c and 3b, c).

47 We also found that CX3CL1 expression and microglial activity in the CeA were  
48 significantly higher than that in control mice at 8 h post ARS-2h, but were slightly lower at this  
49 time point compared to 0.5 h post ARS-2h (please see Response Document Figure 1c-f, and  
50 also see new Figure 2a-d, Figure 4a, b). These results were consistent with the observed changes  
51 in spontaneous spike firing rate of CeA<sup>GABA</sup> neurons, which together indicated that CX3CL1  
52 secretion, microglial activation, and engulfment of CeA<sup>GABA</sup> neuronal dendritic spines were  
53 already occurring after ARS-2h, and gradually decreased over time until returning to control



54 levels by 12 h post ARS-2h, that is, not just within the last 4 hours from 8-12 h post treatment.  
 55 Collectively, these results indicate that the activation of microglia in the CeA, and associated  
 56 changes in their engulfment activity, can gradually recover to control levels with increasing  
 57 time after restraint-induced stress, providing further insights into the mechanisms underlying  
 58 anxiety-like behaviors.

59 These new results are now included in the revised manuscript.

60

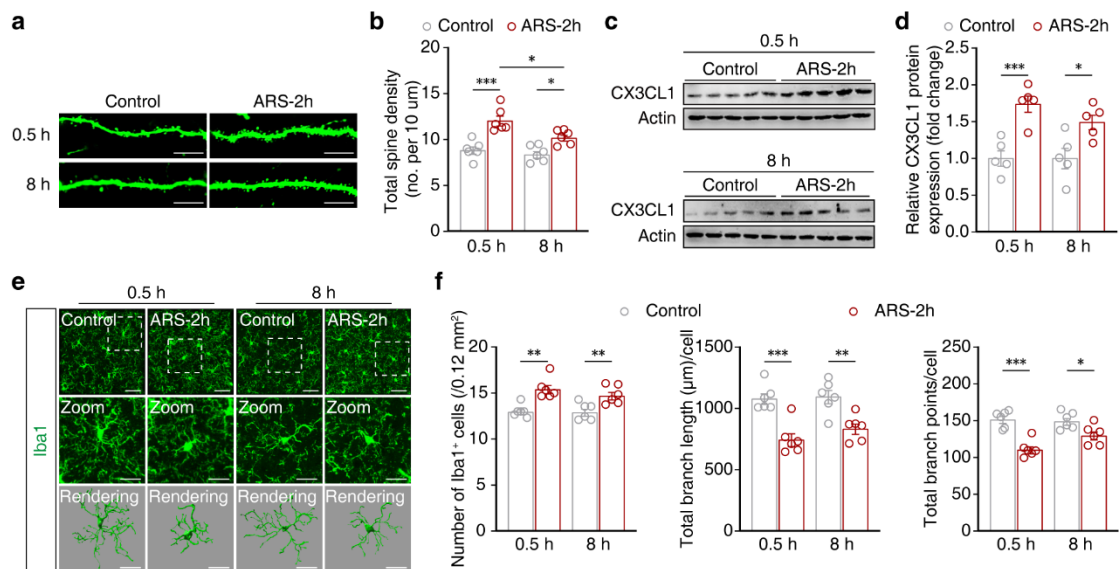

61

62 **Response Document Figure 1. Changes in CeA<sup>GABA</sup> neuronal dendritic spines, CX3CL1**  
 63 **secretion, and microglial activity following ARS-2h.**

64 (a, b) Representative images of neuronal dendrites (a) and summarized data for spine numbers  
 65 per 10 μm (b) (n = 6 mice per group). Scale bars, 10 μm.

66 (c, d) Representative images (c) and quantitative analyses (d) of Western blot analysis of  
 67 soluble CX3CL1 expression in CeA tissues from control, 0.5 h, and 8 h post treatment ARS-2h  
 68 mice (n = 5 mice per group).

69 (e) Representative images of Iba1 immunostaining and 3D reconstruction of microglia in the  
 70 CeA of ARS-2h mice at 0.5 h/8 h post-stress induction and corresponding control mice. Scale  
 71 bars, 40 μm (overview) and 20 μm (inset and rendering).

72 (f) Quantification of Iba1<sup>+</sup> cell numbers and Imaris-based semi-automatic quantification of cell  
 73 morphometry, including total process length and number of branch points of Iba1<sup>+</sup> microglia in  
 74 the CeA at 0.5 h/8 h post-treatment in ARS-2h and control mice (n = 6 mice per group).

75 All data are presented as mean ± SEM. \**p* < 0.05, \*\**p* < 0.01, and \*\*\**p* < 0.001. See also Table  
 76 S1.

77

78 2. Behavioral assays. Subsequent EPM tests usually significantly affect (reduce) the animals'  
 79 "anxiety" measurements (time and entries in open arms) of prior EPM tests. Repeated EPM

80 tests at close intervals (0.5h, 4h, 8h, 12h) of the same animals are highly problematic (Fig. 1d,  
81 e). The heatmaps (Fig. 1d) show no or little time on open-arm at 0.5-8hr post-ARS, and a  
82 striking reversal at 12hr post-ARS, which is not very representative of the statistics (Fig. 1e).  
83 Repeated OFT tests may have similar problems.

84 **Response:** Thanks for raising this question. We completely agree with the Reviewer's  
85 comments and we are grateful for the opportunity to correct an unintentional oversight in the  
86 figure legends. Actually, in our original manuscript, different batches of mice were used for  
87 each anxiety-related behavioral assay, including OFT and EPM tests in order to avoid the very  
88 impacts of previous tests that the Reviewer mentioned. Therefore, as a result, the number of  
89 animals used for behavioral experiments differs among time points in the original submitted  
90 manuscript (please see original Table S1).

91 In addition, the apparent discrepancy between the heatmap and statistics of the OFT and  
92 EPM tests are due to random selection and variability among individual mice in behavioral  
93 performance. As suggested, we have replaced all non-representative heatmaps for the OFT and  
94 EPM tests, and provided more information necessary to clarify our experimental procedures in  
95 the revised manuscript.

96

97 3. Timing of tests. Many comparison experiments were carried out with a 12hr interval (0.5h  
98 vs. 12h post-ARS), which means that these measurements were conducted at the time points  
99 that mice have significantly different levels of activity. This could significantly affect the  
100 behavioral, in vivo electrophysiological and maybe even immunocytochemical results.

101 **Response:** We completely agree with the Reviewer's comments, and again, we regret any  
102 confusion caused by our omission of some important details about the behavioral experiments.

103 There is indeed a wide range of state- and time-dependent activities in organisms, such as  
104 the classic circadian rhythms<sup>1</sup>. Consistently, after reanalysing OFT data, we also found that the  
105 control mice travelled significantly greater distances at 12 h (~10:00 pm) than at 0.5 h (~10:30  
106 am) (please see Response Document Figure 2, and also see new Supplementary Figure 1),  
107 which is consistent previous studies that established mice are nocturnal and therefore exhibit  
108 more activity at night<sup>2,3,4,5</sup>. In fact, all ARS-2h treatments in our original manuscript were  
109 conducted between 8:00-10:00 am, and anxiety-like behaviors were subsequently measured at  
110 different times. Notably, we found no significant difference in distance travelled in OFT tests  
111 at 0.5 h/4 h/8 h/12 h post ARS-2h from that of corresponding control mice (Response Document  
112 Figure 2, and also see new Supplementary Figure 1).

113 We agree that independent mice should be used for this experiment when repeated at  
114 different time points, with corresponding controls for each time point, to exclude time-  
115 dependent effects. Although we followed this approach during the experiment, we only used  
116 immunohistochemistry data from the control group at 0.5 h post-ARS to compare with other

117 groups in order to provide a clear and simplified data presentation. To address concerns raised  
 118 by the Reviewer, we now include all control group data collected in 12 hours following ARS-  
 119 2h, and comparisons if immunohistochemistry data between treatment and control groups are  
 120 performed with samples from the same time point avoid potential time-dependent effects on  
 121 our conclusions. More specifically, no differences in microglial activation, dendritic spines of  
 122 CeA<sup>GABA</sup> neurons, expression levels of the phagocytic marker, CD68, or microglial  
 123 phagocytosis were detected between control and ARS-2h mice at 12 h post treatment (please  
 124 see Response Document Figure 3, and also see new Figure 2a-d, Figure 3a-c, 3g-l and  
 125 Supplementary Figure 9). Furthermore, no differences were detected between control mice at  
 126 0.5 h post-ARS-2h and control mice at 12 h post-ARS-2h (please see Response Document  
 127 Figure 3, and also see new Figure 2a-d, Figure 3a-c, 3g-l and Supplementary Figure 9). Notably,  
 128 we also did not find differences between 0.5 h and 12 h post-ARS-2h control group in the  
 129 neuronal activity detected by *in vivo* multichannel recordings (please see original Figure 1h).

130 In the revised manuscript, we now compare the control groups between the first and last  
 131 time points to show that there is no difference between them (please see new Figure 1h). These  
 132 results are now presented in the revised manuscript.

133

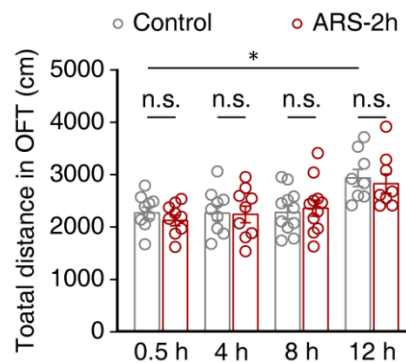

134

135 **Response Document Figure 2. Total distance of ARS-treated mice in OFT test at different**  
 136 **time points.**

137 Summarized data of movement distances in central area of the OFT test in ARS-2h mice at 0.5  
 138 h, 4 h, 8 h, and 12 h post-stress induction and corresponding control mice. Different batches of  
 139 mice were used for each OFT assay (0.5 h, n = 9 mice per group; 4 h, n = 9 mice per group; 8  
 140 h, n = 11 mice per group; 12 h, n = 8 mice per group).

141 All data are presented as mean ± SEM. \* $p < 0.05$ ; n.s., not significant. See also Table S1.

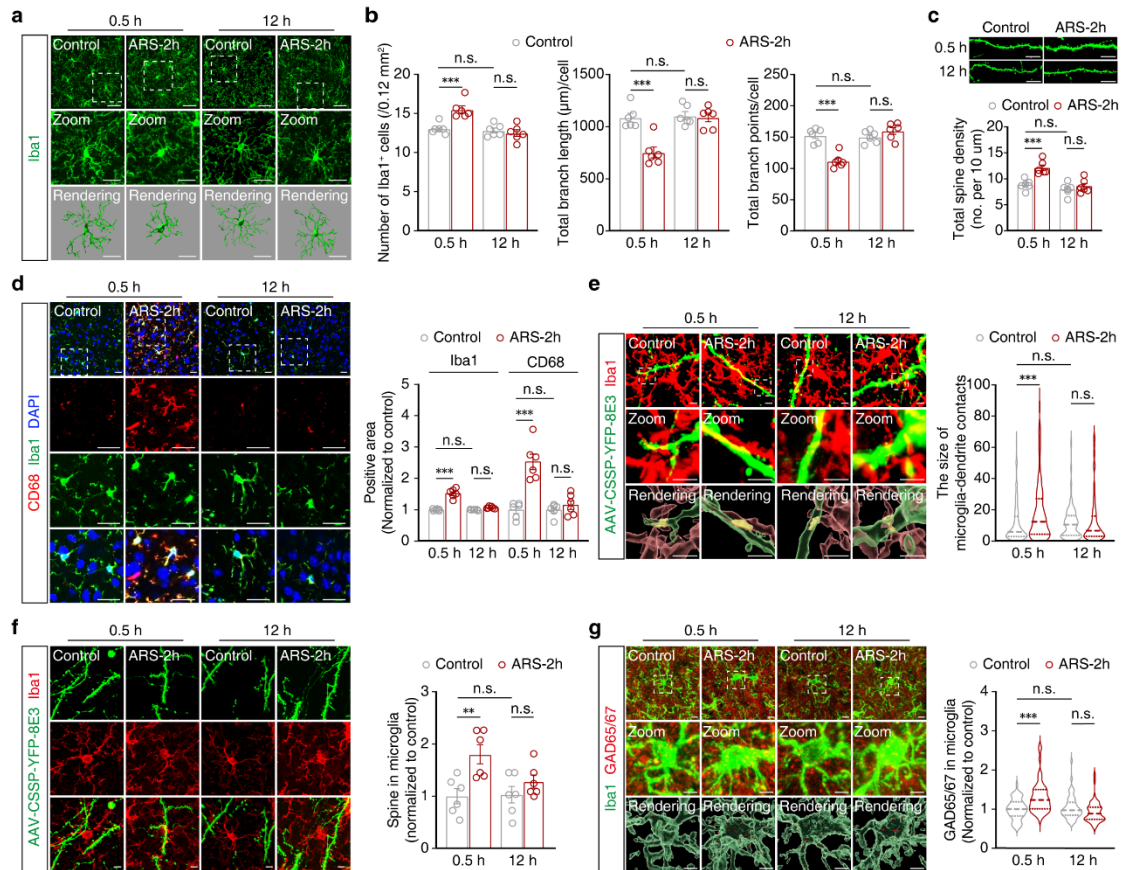

142

143

**Response Document Figure 3. The changes in microglial activation, dendritic spines of CeA<sup>GABA</sup> neurons, expression levels of phagocytic marker CD68, and microglial engulfment following ARS.**

144

**(a)** Representative images of Iba1 immunostaining and 3D reconstruction of microglia in the CeA of ARS-2h mice at 0.5 h/4 h/8 h/12 h post-stress induction and corresponding control mice. Scale bars, 40 μm (overview) and 20 μm (inset and rendering).

145

146

**(b)** Quantification of Iba1<sup>+</sup> cell numbers and Imaris-based semi-automatic quantification of cell morphometry, including the total process length and number of branch points of Iba1<sup>+</sup> microglia in the CeA at 0.5 h/12 h post-stress induction in ARS-2h and control mice (n = 6 mice per group).

147

**(c)** Representative images of neuronal dendrites (top) and summarized data for spine numbers per 10 μm (bottom) (n = 6 mice per group). Scale bars, 10 μm.

148

**(d)** Representative images (left) and quantitative analyses (right) of immunostaining for CD68 (red), Iba1 (green), and DAPI (blue) in the CeA from corresponding control and 0.5 h/12 h post-stress induction mice (n = 6 mice per group). Scale bars, 20 μm.

149

**(e)** Reconstructed images (left) and summarized data (right) of microglia-dendrite contact size between Iba1<sup>+</sup> microglia (red) and YFP<sup>+</sup> neuronal dendrites of GABAergic neurons in the CeA of control or 0.5 h/12 h post-ARS-2h mice (0.5 h control, n = 128 cells from six mice; 0.5 h post-ARS-2h, n = 126 cells from six mice; 12 h control, n = 124 cells from six mice; 12 h post-

150

151

162 ARS-2h, n = 123 cells from six mice). Scale bars, 10  $\mu\text{m}$  (overview) and 5  $\mu\text{m}$  (inset and  
163 rendering).

164 (f) Reconstructed images (left) and summarized data (right) for the number of microglia-  
165 dendritic spines of Iba1<sup>+</sup> microglia (red) containing YFP<sup>+</sup> neuronal dendritic spines of  
166 GABAergic neurons in the CeA from corresponding control or 0.5 h/12 h post-stress induction  
167 mice (n = 6 mice per group). Scale bars, 5  $\mu\text{m}$ .

168 (g) Representative images and 3D surface rendering of Iba1<sup>+</sup> microglia (green) containing  
169 GAD65/67<sup>+</sup> puncta (red) and DAPI (blue) (left), and Quantification of GAD65/67<sup>+</sup> puncta in  
170 microglia (right) in the CeA from corresponding control and 0.5 h/12 h post-ARS-2h mice (n  
171 = 53 cells from six mice per group). Scale bars, 10  $\mu\text{m}$  (overview) and 5  $\mu\text{m}$  (inset and  
172 rendering).

173 All data are presented as mean  $\pm$  SEM. \*\* $p < 0.01$ , and \*\*\* $p < 0.001$ ; n.s., not significant. See  
174 also Table S1.

175

176 4. Intracranial microinfusion. Fig. 2 used cannular implantation to mouse CeA for minocycline  
177 (microglial inhibitor) injection. Guide cannula usually causes a large lesion of the implanted  
178 area, which could trigger microglia activation. Although ACSF injection is used as a control  
179 here, the effect of minocycline could be due to microglia activation by lesion rather than 2hr  
180 restraint stress. When was the multichannel electrode implanted? Was CeA examined after  
181 cannular injection for tissue integrity?

182 **Response:** We thank the Reviewer for pointing out this unintentional omission of details in the  
183 original manuscript that has resulted in confusion. In fact, according to methods described in  
184 previous studies<sup>6,7</sup>, to more effectively deliver the drug, the guide cannula was generally placed  
185 0.2 mm higher than the target nucleus of the CeA. Actually, to minimize damage during drug  
186 delivery, treatments were administered in a single injection by insertion of the internal cannula,  
187 which should be 0.2 mm deeper than the guide cannula. In addition, we specifically avoided  
188 repeated insertion of projection dummy cannula to ensure that we did not cause repeated  
189 activation of glial cells. Moreover, after each behavioral test, we checked the accuracy of  
190 cannular placement and the integrity of the CeA, and excluded data from mice that had a  
191 misplaced cannula or damaged brain tissues. As for the implanted time, the cannula and  
192 multichannel electrode were implanted in mice two weeks before behavioral tests to ensure  
193 sufficient recovery time, as shown in Figure 2d of the originally submitted manuscript.

194 However, there is still no doubt that guide cannula causes a large lesion in the implanted  
195 area. To address the Reviewer's concerns, we now provide imaging data showing the cannular  
196 implantation sites and performed experiments examining gliosis in the CeA. The results showed  
197 that the integrity of CeA brain tissue remained intact (*i.e.*, undamaged) after cannular  
198 implantation by the method described above (please see Response Document Figure 4, and also

199 see new Supplementary Figure 7). Furthermore, immunofluorescent staining for gliosis  
 200 markers, Iba1 and glial fibrillary acidic protein (GFAP), in brain slices of mice with implanted  
 201 cannula showed that although fluorescence signal of Iba1<sup>+</sup> microglia and GFAP<sup>+</sup> astrocytes  
 202 were significantly more abundant in the brain area (Region A, above the CeA) reached by the  
 203 cannula tip than in the corresponding brain area of control mice, no difference was found in the  
 204 fluorescence signal of these glial cells within the CeA between controls and mice with  
 205 implanted cannula (Region B) (please see Response Document Figure 4, and also see new  
 206 Supplementary Figure 7). These results suggest that, in our experiments, there was no damage  
 207 to the target brain area of the CeA due to this strict cannular implantation.

208 These findings thus indicate that activation of microglia in the CeA was indeed caused by  
 209 ARS-2h, not cannular implantation, in the current study. These new results have been  
 210 incorporated into the revised manuscript.

211

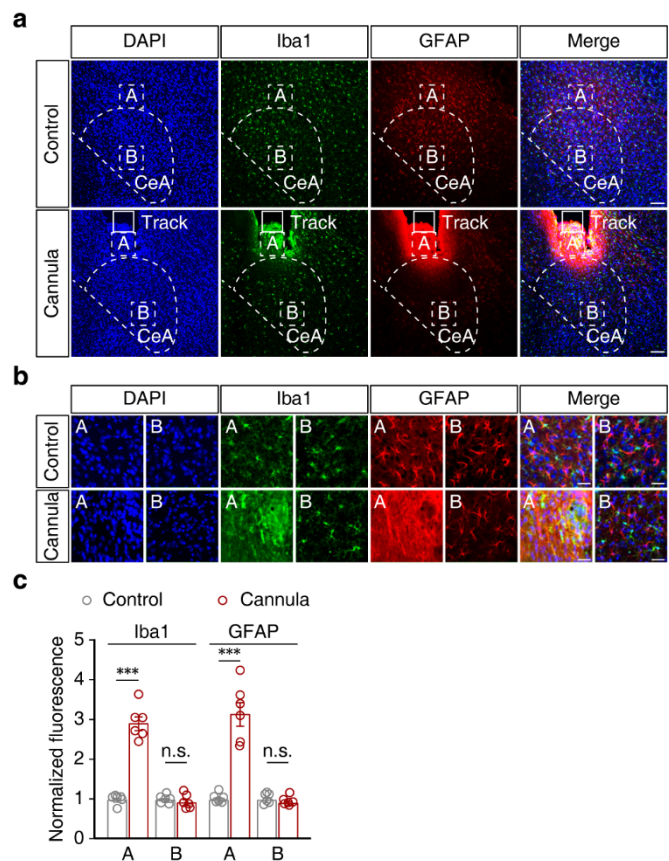

212

213 **Response Document Figure 4. Immunofluorescent staining of Iba1 and GFAP in the CeA**  
 214 **and adjacent regions of naive mice with or without cannular implantation.**

215 (a, b) Representative image (a) and enlarged image (b) of immunostaining for Iba1 and GFAP  
 216 around the cannula position in the CeA of implanted mice and the same position in control mice.  
 217 Scale bars, 100 μm (a) and 20 μm (b).

218 (c) Quantitative analyses of immunostaining for Iba1 and GFAP in (b) (n = 6 mice per group).

219 All data are presented as mean  $\pm$  SEM. \*\*\* $p < 0.001$ ; n.s., not significant. See also Table S1.

220

221 5. The increase of CX3CL1 secretion at 0.5hr post-ARS (Fig. 4b) is not compelling. It is also  
222 puzzling how CX3CL1 mRNA could be increased by 2hr ARS (Fig. 4a).

223 **Response:** These concerns are worth discussing and we have conducted additional experiments  
224 to address this issue. We agree with the Reviewer that careful examination of the increase in  
225 CX3CL1 protein levels in CeA tissues at 0.5 h post treatment in the ARS-2h group compared  
226 to control group in original Figure 4b is indeed not very convincing, and this change is even  
227 less obvious in the gel bands. Further scrutiny of the data from Actin gel bands shows that total  
228 protein content is inconsistent between samples, with higher total protein content in the control  
229 group than in the 0.5 h post-treatment samples of the ARS-2h group. As a result, the gel itself  
230 appears to show no difference in CX3CL1 between groups, while the quantitative image  
231 analysis shows significant differences after adjusting for this variability. To address this issue,  
232 we repeated WB experiments examining changes in CX3CL1 protein level. After ensuring  
233 consistency in the loading of Actin control protein on the gel, we found that CX3CL1 protein  
234 expression was higher in ARS-2h samples collected at 0.5 h post treatment compared to the  
235 corresponding control group (please see Response Document Figure 5, and also see new Figure  
236 4a, b).

237 Regarding the Reviewer's concern about "how to increase CX3CL1 mRNA in 2-hr ARS",  
238 this result is indeed puzzling. Previous animal studies have shown that stress could increase  
239 neuroinflammation levels in the brain<sup>8,9</sup>, including elevated expression of NF- $\kappa$ B and  
240 CX3CL1<sup>10,11,12</sup>. In the original manuscript, we observed that ARS-2h induced an increase in *Nf-*  
241  *$\kappa$ b* transcript levels, consistent with other published data<sup>11</sup>. Since *Cx3cl1* gene expression is  
242 regulated by the transcription factor, NF- $\kappa$ B, the elevation in *Cx3cl1* mRNA levels after 2 hours  
243 of acute stress is reasonable. In addition, our new experimental results showed a significant  
244 decrease in *Cx3cl1* mRNA expression was observed at 0.5 h post-ARS-2h compared to that in  
245 vehicle control animals, following PDTC, a selective inhibitor of NF- $\kappa$ B, pre-administrated into  
246 the CeA (please see Response Document Figure 6d, and also see new Figure 4p). These findings  
247 provide evidence that the NF- $\kappa$ B signalling pathway is involved in regulating CX3CL1 protein  
248 expression in acute stress states.

249 We present these results and an accompanying description in the revised manuscript.

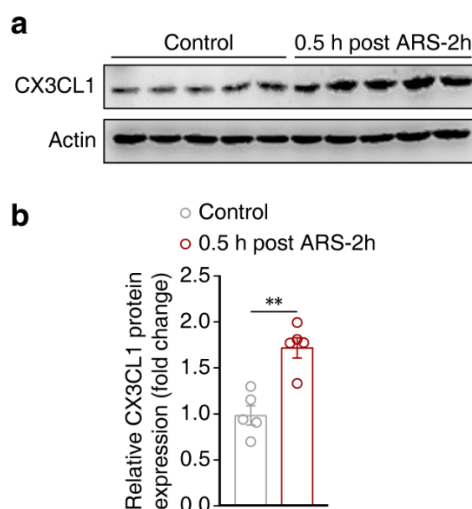

250

251 **Response Document Figure 5. The expression of CX3CL1 protein at 0.5 h post ARS-2h.**

252 **(a, b)** Representative gel images **(a)** and quantitative analyses **(b)** of Western blot detection of  
 253 soluble CX3CL1 protein in CeA samples from control and ARS-2h mice at 0.5 h post-stress  
 254 induction (n = 5 mice per group).

255 All data are presented as mean ± SEM. \*\**p* < 0.01. See also Table S1.

256

257 6. The data with JMS-17-2 (CX3CR1 antagonist) used i.p. injections for microglia and spine  
 258 measurements and local (cannular) injections for behavioral and electrophysiological  
 259 experiments, why were the different routes of injections used? When was the multichannel  
 260 electrode implanted?

261 **Response:** We regret any confusion due to missing details or vague descriptions of our results  
 262 in the originally submitted manuscript.

263 In this study, all *in vivo* pharmacological experiments were administered via implanted  
 264 cannula except for multichannel electrophysiological recordings, which required drug  
 265 administration via intraperitoneal (i.p.) injection. We acknowledge that local administration can  
 266 indeed better demonstrate the function of the target brain area, but due to technological and size  
 267 limitations of the CeA, it is currently not feasible to implant both a multichannel electrode and  
 268 a cannula, simultaneously, in the same brain area of mice. For this reason, we used a different  
 269 strategy for drug injection for experiments requiring multichannel electrodes.

270 In addition, although i.p. administration of JMS-17-2 may affect a wider range of brain  
 271 areas, *in vivo* electrophysiological recording data in the original manuscript showed that  
 272 CeA<sup>GABA</sup> neurons in model mice still exhibited high-frequency discharge levels at 12 h post-  
 273 ARS-2h. At a minimum, these results suggested that increased activity of the CX3CL1  
 274 signalling pathway in CeA<sup>GABA</sup> neurons is indeed involved in the extinction of anxiety-like  
 275 behaviors in mice with restraint-induced acute stress, and at least partially supported the  
 276 reliability of results obtained by *in vivo* multichannel electrophysiological recordings in mice



277 with JMS-17-2 injections (i.p.).

278 In this study, the multichannel electrodes were implanted in mice two weeks before i.p. drug  
279 administration to ensure sufficient recovery time for the mice<sup>13,14</sup>. The restraint treatment was  
280 applied for 2 hours after drug administration, and the signal was recorded at relevant time points.  
281 As mentioned in comment #4 by this Reviewer, we now provide details of the multichannel  
282 electrode implantation process in the revised manuscript.

283

284 7. Fig. 5. The justification of examining the participation of MST4 is very weak (line 260-262).  
285 NFκB can be regulated by many molecules other than MST4. The involvement of NFκB lacks  
286 solid evidence. To more convincingly demonstrate the role of MST4 in anxiety extinction, the  
287 level of MST4 at 12h post ARS, as well as the effect of MST4 on CX3CL1 secretion, needs to  
288 be examined.

289 **Response:** We greatly appreciate this astute and highly constructive comment. As suggested,  
290 we conducted additional experiments to address this issue and extended our discussion of this  
291 topic in the revised manuscript.

292 Regarding of the Reviewer's concern that "The involvement of NF-κB lacks solid  
293 evidence", we sought to establish a firm, experimentally well-supported relationship between  
294 NF-κB and CX3CL1 following acute stress induction. To this end, we administrated  
295 Pyrrolidinedithiocarbamate ammonium (PDTC), a selective inhibitor of NF-κB, via implanted  
296 cannula in the CeA. In these mice, the extinction of ARS-2h-induced anxiety-like behaviors  
297 was blocked following PDTC administration, accompanied by a significant decrease in *Cx3cll*  
298 mRNA expression compared to that in control animals (please see Response Document Figure  
299 6, and also see new Figure 4m-p). These findings suggested that the NF-κB signalling pathway  
300 is involved in regulating CX3CL1 expression and extinction of anxiety-like behaviors.

301 As recommended, we also sought to demonstrate the role of MST4 in anxiety extinction  
302 through new experiments examining MST4 protein levels in the CeA at 12 h after ARS-2h, as  
303 well as the effect of MST4 on CX3CL1 secretion. Our results showed that MST4 protein levels  
304 returned to that of controls at 12 h post-ARS-2h (please see Response Document Figure 7, and  
305 also see new Figure 5c), while MST4 knockdown resulted in a significant increase in CX3CL1  
306 protein accumulation in the CeA of naïve (non-ARS) mice compared levels in control mice  
307 without MST4 knockdown (please see Response Document Figure 8, also see new Figure 6e).  
308 These results were consistent with the increased *Cx3cll* mRNA expression in the ARS-2h mice  
309 that we reported in the originally submitted manuscript (Extended Data Fig. 10c). Taken  
310 together, these findings support the hypothesis that MST4-NF-κB play a functional role in the  
311 extinction of anxiety-like behaviors by modulating CX3CL1 levels in the CeA.

312 In addition, we note that little background is provided for MST4 in the Introduction of the  
313 original manuscript. Previous reports have shown that acute stress can lead to increased

314 microglial activation and heightened inflammatory response in the brain, and has even been  
 315 associated with activation of the CX3CL1/CX3CR1 signaling pathway in the amygdala and  
 316 hippocampus<sup>12,15,16,17</sup>. This activation of inflammatory response can be detrimental to neuronal  
 317 function and may disrupt homeostatic balance in the central nervous system. During innate  
 318 immune response, Toll-like receptors recognize pathogen-associated molecular patterns, and  
 319 rapidly activate the immune inflammatory response through the signaling molecule, TRAF6  
 320 (TNF receptor associated factor 6), to facilitate the elimination of pathogens<sup>18,19,20,21</sup>. In healthy  
 321 organism, the inflammatory immune response requires precise regulation to mediate pathogen  
 322 clearance without also damaging the host, that is, immune homeostasis. Mammalian sterile20-  
 323 like kinase 4 (MST4) has been previously reported to directly phosphorylate TRAF6, inhibiting  
 324 its ubiquitination, and subsequently limiting inflammatory response<sup>22</sup>. Thus, MST4 could act  
 325 as a “brake” on TLR-TRAF6-mediated inflammatory responses. By contrast, TRAF6 is known  
 326 to play a pivotal role in NF-κB activation and TLR4 (toll like receptor 4) pathway-mediated  
 327 macroautophagy/autophagy activation<sup>21,23</sup>. Following the induction of acute stress, the MST4-  
 328 NF-κB-CX3CL1 signaling pathway exerts an important role in maintaining immune  
 329 homeostasis during inflammatory response.

330 This background for MST4 has been added to the revised manuscript, along with the above  
 331 new results and accompanying text.

332

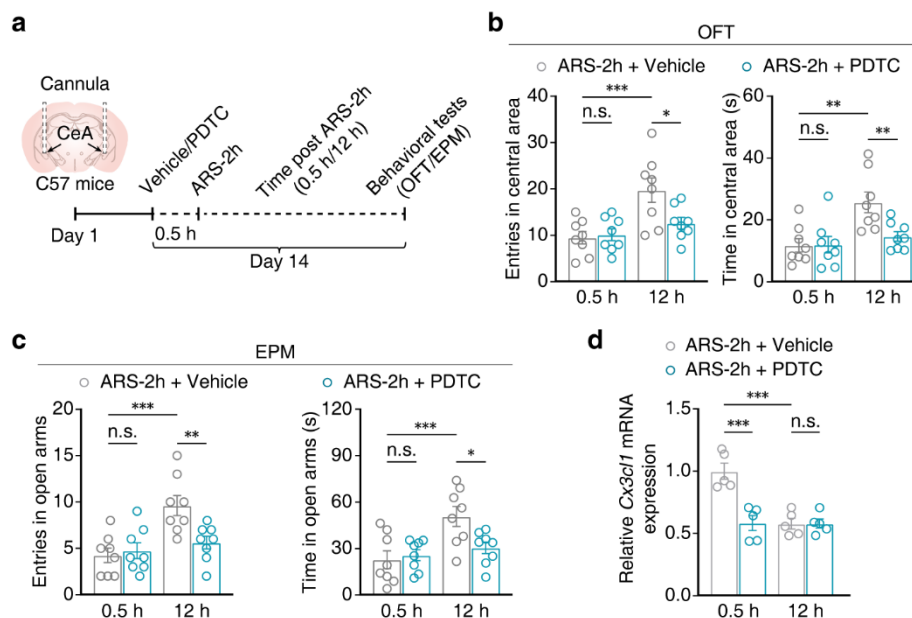

333

334 **Response Document Figure 6. Inhibition of NF-κB signaling in the CeA blocks the**  
 335 **extinction of acute stress-associated anxiety-like behaviors.**

336 **(a)** Experimental scheme for pretreatment of ARS-2h mice with vehicle or PDTC.

337 **(b)** Summarized data for number of entries and time spent in central area in OFT by ARS-2h

338 mice pre-treated with vehicle or PDTC (0.5 h: ARS-2h + Vehicle, n = 8 mice, ARS-2h + JMS-

339 17-2, n = 8 mice; 12 h: ARS-2h + Vehicle, n = 8 mice, ARS-2h + JMS-17-2, n = 8 mice).  
 340 (c) Summarized data for number of entries and time spent in open arms of EPM by ARS-2h  
 341 mice pre-treated with vehicle or PDTC (0.5 h: ARS-2h + Vehicle, n = 8 mice, ARS-2h + JMS-  
 342 17-2, n = 8 mice; 12 h: ARS-2h + Vehicle, n = 8 mice, ARS-2h + JMS-17-2, n = 8 mice).  
 343 (d) qPCR analysis of *Cx3cl1* mRNA expression in the CeA of ARS-2h mice pre-treated with  
 344 vehicle or PDTC (n = 5 mice per group).  
 345 All data are presented as mean ± SEM. \**p* < 0.05, \*\**p* < 0.01, and \*\*\**p* < 0.001; n.s., not  
 346 significant. See also Table S1.  
 347

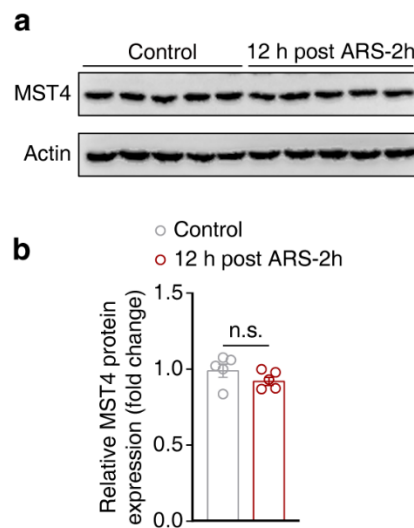

348  
 349 **Response Document Figure 7. MST4 protein levels return to that of control mice at 12 h**  
 350 **after ARS-2h.**  
 351 (a, b) Representative gel images (a) and quantitative analyses (b) for Western blot detection of  
 352 MST4 protein in CeA tissues from control and ARS-2h mice at 12 h post-stress induction (n =  
 353 5 mice per group).  
 354 All data are presented as mean ± SEM. n.s., not significant. See also Table S1.  
 355

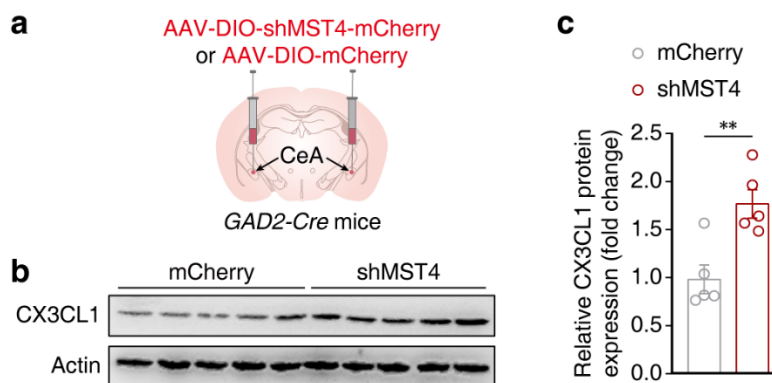

356  
 357 **Response Document Figure 8. MST4 knockdown in naïve mice increases CX3CL1 protein**  
 358 **accumulation in the CeA.**

359 (a) Schematic for bilateral virus infection into the CeA of *GAD2-Cre* mice.  
360 (b) Representative gel images for Western blot detection of soluble CX3CL1 expression in the  
361 CeA of naïve mice infected with AAV-mCherry or AAV-shMST4-mCherry.  
362 (c) Quantitative analyses for CX3CL1 bands for the gel in (b) (n = 5 mice per group).  
363 All data are presented as mean ± SEM. \*\* $p < 0.01$ . See also Table S1.  
364  
365 We would like to take this opportunity to again thank the Reviewer for their very helpful  
366 guidance and highly constructive questions about our study.

367 **Reviewer #2:**

368 Chen et al, authors of the manuscript, "Microglia govern extinction of acute stress-induced  
369 anxiety" present data that indicate neuron-microglia interactions are important mediators of  
370 behavioral responses following acute restraint stress. This is an interesting paper will several  
371 cutting-edge approaches used to demonstrate microglia may contribute to observed  
372 neurobiological and behavioral outcomes. Despite this, there are concerns about data  
373 interpretation and limitations of experimental approaches detract from the impact of this work.  
374 This work is likely to be of interest to the broad readership of Nature Communications, but the  
375 points outlined below should be addressed prior to publication.

376

377 **Main points:**

378 1. The initial data demonstrate that stress-induced activation of CeA<sup>GABA</sup> neurons is related to  
379 and sufficient to modulate behavioral responses to acute restraint stress. This raises the question  
380 as to why the authors wanted to add microglia, and not other non-neuronal cell types, into this  
381 model. Specifically, why are microglia uniquely suited to regulate this response? Perhaps this  
382 can be discussed.

383 **Response:** We would first like to thank the Reviewer for their supportive comments and  
384 guidance in improving our study.

385 In this manuscript, we found that ARS causes an increase in the activity of CeA<sup>GABA</sup>  
386 neurons, resulting in anxiety-like behaviors within 12 hours; at the same time, the number of  
387 CeA<sup>GABA</sup> neuronal dendritic spines also increases in ARS-2h mice, then gradually decreases  
388 over time until returning to control levels by 12 h post ARS-2h. Based on these findings, we  
389 speculated that synaptic pruning could potentially mediate this change in CeA<sup>GABA</sup> neuronal  
390 plasticity.

391 In the central nervous system, two main types of glial cells are involved in synaptic  
392 pruning, including microglia and astrocytes<sup>24,25,26</sup>. Microglia regulate synaptic pruning, a  
393 critical process in refining neural circuits, through various signaling pathways: First, microglia  
394 express complement system proteins, such as C1q and C3, which tag synapses for microglial  
395 engulfment<sup>27,28,29,30,31</sup>; Second, microglia can interact with neurons through signaling molecules  
396 that are regulated by neuronal activity, such as fractalkine (CX3CL1) and its receptor  
397 (CX3CR1), to modulate synaptic pruning<sup>25,32,33</sup>; Third, microglia have been shown to bind IL-  
398 33 released from astrocytes via IL1RL1, activating their function in neuronal synaptic pruning  
399 in the nerve injury mice model<sup>34,35,36</sup>.

400 Astrocytes were historically thought to provide structural and metabolic support for  
401 neurons<sup>37</sup>. More recent studies have shown that astrocytes can directly engulf and eliminate  
402 synapses during development and in conditions such as Alzheimer's disease and epilepsy<sup>28,38</sup>.  
403 In addition, astrocytes can also contribute to synaptic pruning by releasing factors that guide

404 microglia to specific synapses targeted for elimination<sup>25,38</sup>. However, there is currently no  
405 evidence supporting a role of astrocytes in synaptic pruning in response to stressful stimuli.

406 Oligodendrocytes, another important type of glial cell, are primarily responsible for the  
407 regulation of axon growth, and the production and maintenance of the myelination in the central  
408 nervous system. Some limited evidence suggests that mature oligodendrocytes are not directly  
409 involved in synaptic pruning, although oligodendrocyte precursor cells engulf synapses during  
410 circuit remodeling in mice<sup>39</sup>. Based on our evidence obtained while establishing our current  
411 ARS-2h murine model, together with the reasons described above, we focused on microglia  
412 rather than astrocytes and oligodendrocytes in the current study.

413 We have added some text related to this topic to the revised Discussion section.

414

415 2. One major concern is the interpretation of behavioral tests, in this case the OPT and EPM.  
416 Traditionally these tests were considered measures of ‘anxiety-like behavior’. However, it is  
417 accepted now that rodent models do not recapitulate the complexity of psychiatric disorders,  
418 such as anxiety disorders. The behavioral outcomes reflect domains relevant to psychiatric  
419 disorders but it is not entirely clear how this relates to clinical cases. It is recommended that the  
420 authors limit use of ‘anxiety-like behavior’. It would be more suitable to report this as changes  
421 in exploratory behavior or aversion to novel environments. Either way the authors should report  
422 the specific outcomes (i.e., decreased time in center or open arms) and then describe the  
423 potential significance in the Conclusion.

424 **Response:** We appreciate the Reviewer’s perspective and guidance. We completely agree that  
425 using the term “anxiety-like behavior” may be an inaccurate description of the phenotype  
426 defined by EPM and OFT behavioral assays, since these tests cannot fully capture the  
427 complexity of anxiety disorders<sup>40,41,42</sup>. As suggested, we have replaced more than half of the  
428 “anxiety-like behaviors” with “low level of exploratory behaviors” in the revised manuscript.

429 As recommended, we now refer to the observed behavioral changes in mice as alterations  
430 in exploratory behaviors in the revised manuscript. We have also modified the paper to report  
431 specific outcomes, such as decreased time spent in the center of OFT or open arms of EPM, to  
432 provide a more accurate description of the observed behavioral changes, while reserving the  
433 broader potential significance of these behavioral changes for our conclusions.

434

435 3. Related to behavioral testing it is unclear if mice were repeatedly tested in Fig.1b-e. This is  
436 important as rodents will adapt their responses after exposure to a novel environment.

437 **Response:** We completely agree Reviewer’s concern that “rodents will adapt their responses  
438 after exposure to a novel environment” in behavioral assays. Some confusion about our  
439 experimental design has arisen due to an unfortunate oversight in our description of the  
440 experimental details. In the originally submitted manuscript, different batches of mice from the

441 ARS-2h and control groups were in fact used for each exploratory behavioral assay, including  
442 EPM and OFT tests, in order to exclude the effects of previous tests on the current test. For  
443 these reasons, the number of animals used in behavioral experiments at each time point is not  
444 consistent in the original version of the paper (please see original Table S1). More information  
445 necessary to understand our experimental design has been added to the figure legends of the  
446 revised manuscript.

447

448 4. Density and morphological features of microglia is not sufficient to determine their  
449 functional state. Just based on immunohistology results it is unclear if these cellular responses  
450 are related to increased neuroinflammation or an alternate phenotype. It is recommended that  
451 further molecular or cellular characterization be performed.

452 **Response:** We thank the Reviewer for this valuable suggestion. Although our study reveals that  
453 activated microglia inhibit CeA<sup>GABA</sup> neuronal activity via engulfment of their dendritic spines,  
454 ultimately leading to the fading of restraint stress-induced anxiety-like behaviors in male mice,  
455 it is indeed unknown whether neuroinflammation is required for this phagocytosis. Previous  
456 studies have shown that microglia are often accompanied by neuroinflammation when they are  
457 activated and phagocytosed<sup>43,44,45,46</sup>. In order to more rigorously characterize the functional state  
458 of microglia, we conducted additional experiments, as recommended by the Reviewer,  
459 including immunofluorescent staining for the inflammatory marker MHCII as well as a panel  
460 of classical inflammatory factors that co-localize with Iba1. We found that MHCII levels were  
461 significantly increased in ARS-2h mice compared with controls at 0.5 h post-stress induction  
462 (please see Response Document Figure 9a, b, and also see new Supplementary Figure 5a, b),  
463 which was consistent with the observed changes in microglial Iba1 expression. In addition, the  
464 increased levels of the phagocytosis marker, CD68, in ARS-2h mice at 0.5 h post-stress  
465 induction that showed in the original data, further indicating that phagocytic function was  
466 enhanced in microglia of ARS-2h mice (please see original Figure 3g).

467 To further test whether ARS can cause classical inflammatory changes in microglia, we  
468 used immunofluorescent staining to measure changes in TNF $\alpha$ , IL-1 $\beta$ , and IL-6 in microglia.  
469 The results revealed that TNF $\alpha$ , IL-1 $\beta$  and IL-6 were all significantly upregulated in microglia  
470 of the CeA from ARS-2h mice at 0.5 h post-stress induction compared with controls (please see  
471 Response Document Figure 9c, and also see new Supplementary Figure 5c-h). These findings  
472 are consistent with previous studies and support the notion that the observed cellular responses  
473 of microglia are indeed associated with increased neuroinflammation under ARS.

474 These additional data are presented in the revised manuscript.

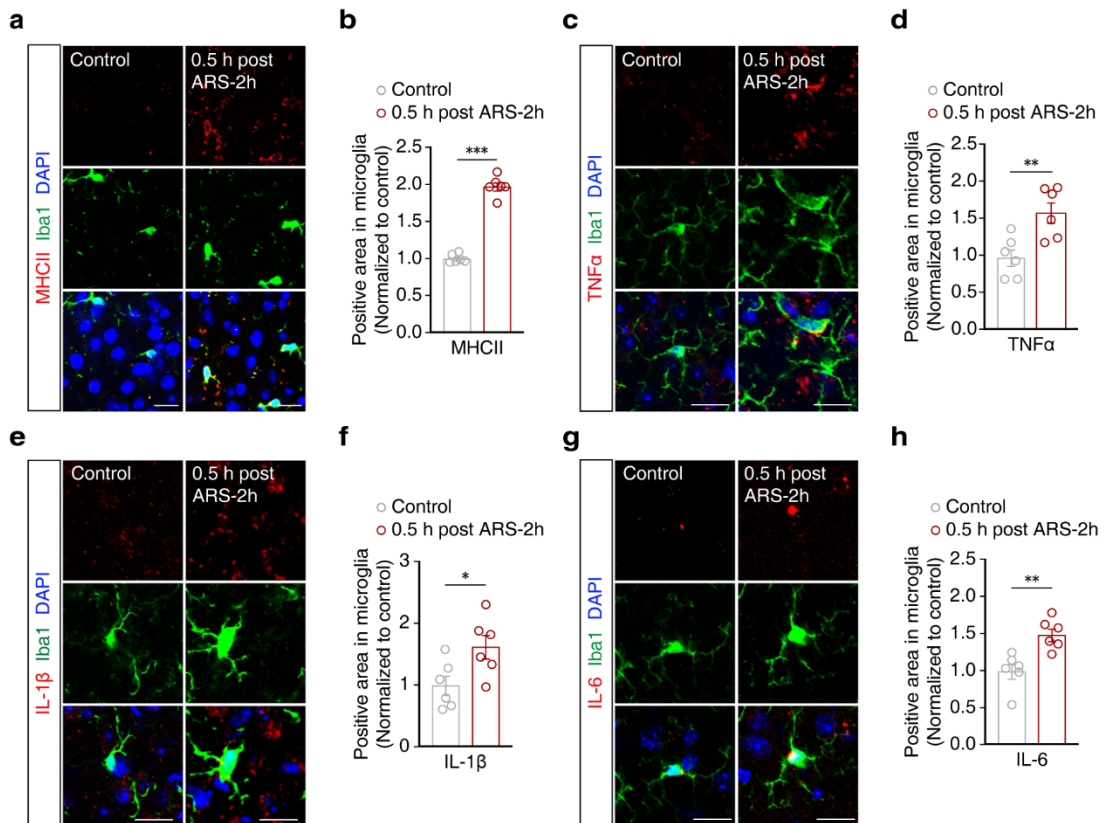

475

476

**Response Document Figure 9. Immunofluorescent staining for the inflammatory marker MHCII and a panel of classical inflammatory factors in microglia.**

477

478 (a, b) Representative images (a) and quantitative analyses (b) of immunostaining for MHCII  
 479 (red), Iba1 (green), and DAPI (blue) in the CeA of 0.5 h/12 h post ARS-2h and corresponding  
 480 control mice (n = 6 mice per group). Scale bars, 20 μm.

481 (c-h) Immunofluorescent staining (c, e, g) and quantitative analyses (d, f, h) of TNFα, IL-1β,  
 482 and IL-6 co-localized with Iba1 in the CeA of ARS-2h and control mice at 0.5 h post-treatment.  
 483 Scale bars, 20 μm.

484 All data are presented as mean ± SEM. \*p < 0.05, \*\*p < 0.01, and \*\*\*p < 0.001; n.s., not  
 485 significant. See also Table S1.

486

487 5. It is intriguing that microglia density in the BLA particularly, fluctuates over such short time  
 488 frames. Prior studies indicate that microglia turnover and proliferation is low (in the absence of  
 489 injury). The authors should validate these changes in density with markers for proliferation or  
 490 cell death.

491 **Response:** We appreciate your insightful comment about our observations of significant  
 492 fluctuation in microglia density in the CeA within the relatively short experimental timeframe.  
 493 While we agree that some prior studies show that microglial turnover and proliferation is low  
 494 in the absence of injury<sup>47,48,49,50</sup>, other previous studies have shown that certain brain regions,  
 495 including the amygdala, medial prefrontal cortex, anterior cingulate cortex and hippocampus,



496 can rapidly activate microglia in response to stress stimuli<sup>12,17,51,52,53,54</sup>. Thus, the increased  
 497 number of microglia we detected under acute stress stimuli may be due to excessive  
 498 proliferation and differentiation. As suggested, we carried out additional experiments using  
 499 Ki67, a marker for proliferation, and TUNEL (cell death) assays at different time points  
 500 following ARS-2h treatment to further validate our observations of changes in microglial  
 501 density in ARS model mice. We found that Ki67 expression significantly increased in microglia  
 502 in the CeA of ARS-2h mice at 0.5 h post-treatment compared to that in controls, followed by a  
 503 gradual decrease over time (please see Response Document Figure 10a, b, and also see new  
 504 Figure 2e-g). In contrast, TUNEL assays showed that apoptosis levels peaked at 8 hours post-  
 505 ARS-2h, then returned to baseline levels at 12 hours post-ARS-2h treatment (please see  
 506 Response Document Figure 10c, d, and also see new Supplementary Figure 6). These findings  
 507 further illustrate the dynamic activation of microglia and subsequent restoration to resting levels  
 508 in the CeA following ARS-2h treatment.

509 We present these results in the revised manuscript.

510

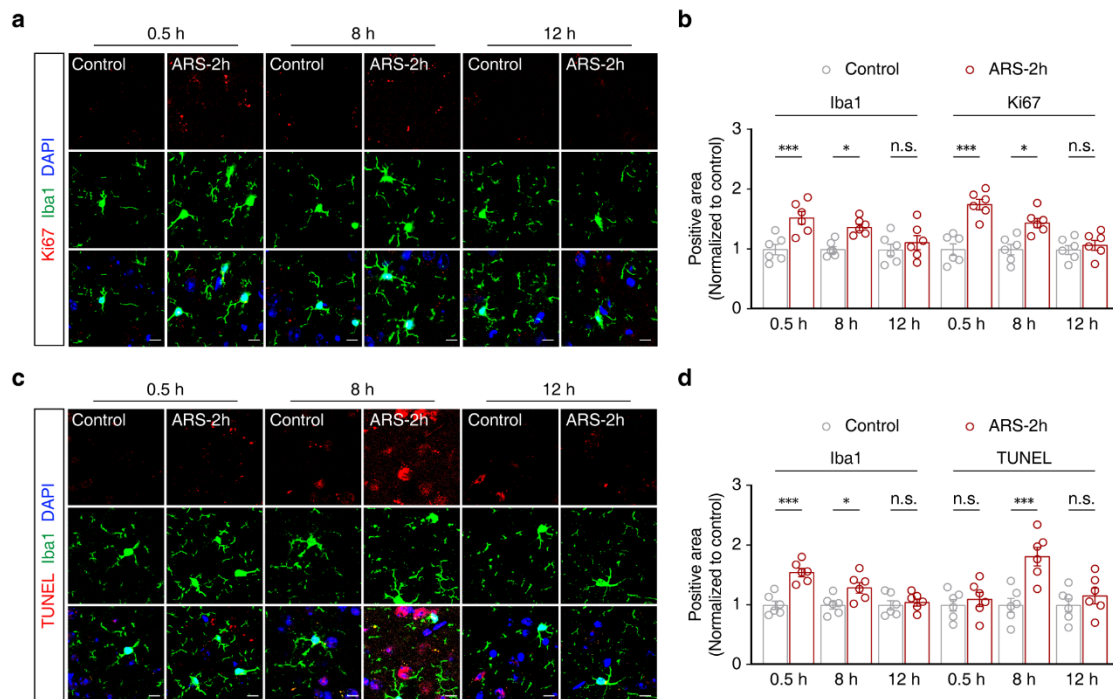

511

512 **Response Document Figure 10. Immunofluorescent staining for Ki67 and TUNEL assays**  
 513 **following ARS-2h treatment in mice.**

514 **(a, b)** Representative images **(a)** and quantitative analyses **(b)** of immunostaining for Ki67 (red),  
 515 Iba1 (green), and DAPI (blue) in the CeA of ARS-2h and control mice at 0.5 h post-stress  
 516 induction (n = 6 mice per group). Scale bars, 10  $\mu$ m.

517 **(c, d)** Representative images **(c)** and quantitative analyses **(d)** of TUNEL assays; fragmented  
 518 DNA (red), Iba1 (green), and DAPI (blue) in the CeA of ARS-2h and control mice at 0.5 h/8

519 h/12 h post-treatment (n = 6 mice per group). Scale bars, 10  $\mu$ m.

520 All data are presented as mean  $\pm$  SEM. \* $p$  < 0.05, and \*\*\* $p$  < 0.001; n.s., not significant. See  
521 also Table S1.

522

523 6. Minocycline should not be considered an inhibitor of microglia. Since it was administered  
524 centrally it is likely influences molecular and cellular pathways in multiple cell types. As such,  
525 the authors should temper their conclusions regarding this approach.

526 **Response:** We understand the Reviewer's concerns and appreciate their insight. In the original  
527 manuscript, we describe minocycline as a "microglial inhibitor... used for selective  
528 pharmacological inhibition of microglia", which we now understand to be inappropriate. We  
529 have replaced that description with "minocycline, which has been widely used to inhibit  
530 microglial activity," in the revised manuscript. As suggested, we also appropriately temper our  
531 conclusions regarding the specific effects of minocycline on microglia in the revised paper.

532

533 7. In Fig.3, it appears that dendritic segments were used as individual samples. This is not  
534 appropriate, because dendritic segments from one mouse should not be considered independent  
535 samples. Segments from each mouse should be averaged to generate a cumulative average and  
536 then statistical analyses should be carried out on these samples. As is, the sample size artificially  
537 increases the statistical power and over-estimates group differences.

538 **Response:** Thanks for this helpful guidance. We completely agree with the Reviewer's  
539 suggestion. However, we found that, regrettably, some details of the data analysis were left out  
540 of the original manuscript. Actually, each data point represents one cell, not one dendritic  
541 segment, in the plots of spine density in our original manuscript (please see original Table S1).  
542 In fact, at least 3–5 dendritic segments were averaged for each analyzed cell, and about twenty-  
543 five cells from six total mice were examined in each group. As suggested, we have reorganized  
544 our data to clearly show that each symbol represents one mouse in the revised manuscript  
545 (please see new Figure 3c, 3f, Figure 4h, and also see new Supplementary Figure 9d).

546

547 8. There are other concerns about the immunohistology in Fig.3. First, the CD68  
548 immunolabeling seems particularly intense at the 0.5 h timepoint. Enlarged images should be  
549 presented to validate co-localization with IBA1. Second, immunohistology and 3D image  
550 analyses are used to suggest that microglia are engulfing GABA neuron structures (GAD65/67).  
551 The authors have rendered the synaptic markers and other puncta (i.e., colored 'nodes'), and it  
552 is recommended that these manipulations be removed. Moreover, these results are questionable  
553 as it appears that even in control mice there is an unusually high number of inclusions in  
554 microglia. This is further exaggerated in mice exposed to acute restraint. The authors need to  
555 reassess the specificity of their antibodies and their thresholds for image analyses. Also any

556 engulfed synaptic structures should be within lysosomes, so the authors should validate these  
557 inclusions with CD68 immunolabeling. Finally, it is not clear how this data was quantified and  
558 ‘normalized’ in Fig.3l. Again individual cells should be considered independent samples.

559 **Response:** Thanks for the careful examination of our figures and this helpful guidance. As  
560 suggested, we have added the relevant enlarged images to validate co-localization of CD68  
561 with Iba1 in mice at 0.5 h and 12 h post-ARS-2h treatment (please see Response Document  
562 Figure 11a, b, and also see new Figure 3g). In addition, we have removed the colored puncta  
563 from images in original fig. 3k, which are actually the neuronal nuclei stained by DAPI (please  
564 see Response Document Figure 11c, d, and also see new Figure 3h).

565       Regarding the Reviewer’s concern that “these results are questionable as it appears that  
566 even in control mice there is an unusually high number of inclusions in microglia”, we believe  
567 that there may be two reasons for this. First, we checked the related studies of the GAD65/67  
568 antibody (ab183999, abcam) used in this study. The WB experiments of the antibody are  
569 provided by the official website of Abcam ([https://www.abcam.cn/products/primary-  
570 antibodies/gad65--gad67-antibody-epr19366-ab183999.html](https://www.abcam.cn/products/primary-antibodies/gad65--gad67-antibody-epr19366-ab183999.html)), which showed two bands with  
571 antibodies against GAD67 and GAD65 fragment recombinant proteins in mouse. In addition,  
572 the GAD65/67 antibody have been widely used in immunofluorescent staining in numerous  
573 studies<sup>55,56</sup>. Second, although there are many GAD65/67 punctas in microglia from control mice,  
574 we found that the macrophage marker CD68 is rarely expressed in the control mice (please see  
575 original Figure 3g, h), so there should not be as much microglial engulfment in the control mice.  
576 Therefore, it seems that the low threshold adjustment in the algorithm of the microglial  
577 engulfment analysis results in unusually high number of inclusions in microglia from control  
578 mice. Briefly, the Imaris MATLAB-based (MathWorks) plugin “Split into Surface Objects” was  
579 used to assess the number of GAD65/67 puncta in microglia (distance  $\leq 0 \mu\text{m}$ ). Based on this  
580 analytical method, the data of the engulfed synaptic marker are from the GAD65/67 puncta that  
581 entirely within microglia as well as those distributed on these cell surface. As suggested, we  
582 have readjusted the “Estimated XY Diameter” from  $0.8 \mu\text{m}$  to  $0.9 \mu\text{m}$ , which is used to estimate  
583 the size of GAD65/67 puncta. After adjusting the parameters, we found that the number of  
584 GAD65/67 puncta in microglia from the control groups and ARS-2h mice were significantly  
585 reduced, but the increase in the number of GAD65/67 puncta in CeA microglia at 0.5 h post-  
586 ARS-2h compared with control mice, was still remained (please see Response Document  
587 Figure 11c, d, and also see new Figure 3h). These results indicate that the threshold is indeed  
588 too low.

589       Again, we regret any confusion stemming from insufficient detail about our methods. We  
590 have added the information necessary to fully understand these experiments in the revised  
591 Methods section.

592       To address the suggestion that inclusions require validation by CD68 immunolabeling, we

593 have conducted additional experiments in which microglia are co-labeled with CD68 and  
594 GAD65/67. Confocal imaging data and 3D surface rendering further depict abundant  
595 colocalization between immunoreactive puncta of GAD65/67, CD68, and Iba1<sup>+</sup> microglia in  
596 the CeA of ARS-2h mice at 0.5 h, but not at 12 h post-treatment, nor in the corresponding  
597 control animals (please see Response Document Figure 11e, f, and also see new Figure 3i).  
598 These results are fully consistent with our previous findings that show an increase in  
599 colocalization of GAD65/67 immunoreactive puncta with Iba1<sup>+</sup> microglial processes in the CeA  
600 at 0.5 h post-ARS-2h, compared with control mice, and that this phenomenon no longer occurs  
601 at 12 h post-ARS-2h (please see original Figure 3k, l). These results thus confirm that engulfed  
602 synaptic puncta are present within microglia in the CeA of ARS-2h mice.

603       Regarding the concern that “how data were normalized and quantified in Figures 3l”, in  
604 fact, mice were randomly selected from the control and ARS groups to collect phagocytosis  
605 data from intact microglia. In addition, to normalize the data, we used the mean value obtained  
606 from the control group as a reference and expressed data from the treatment group as a  
607 percentage of this mean. Furthermore, as mentioned above and following the Reviewer’s  
608 recommendation, individual cells were used as independent samples.

609       These results are all presented in the revised version of the paper.

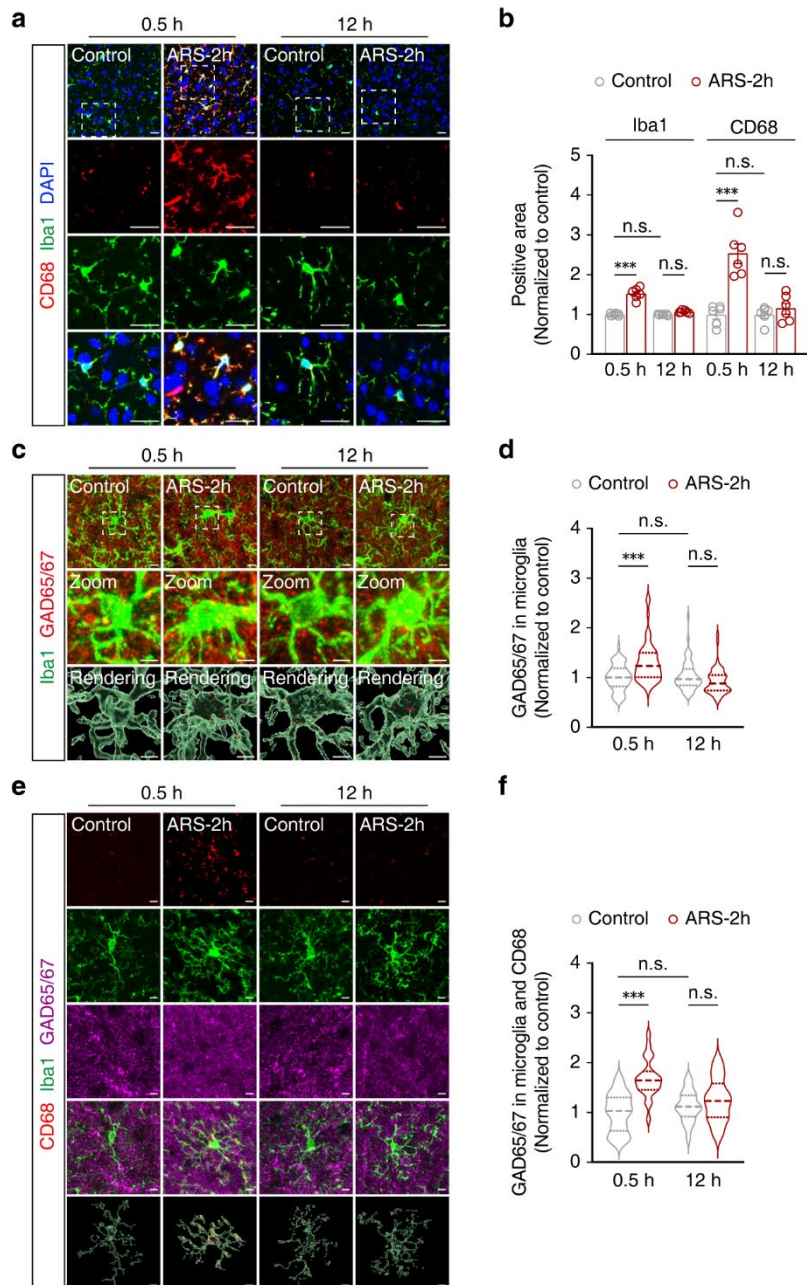

610

611 **Response Document Figure 11. Microglial engulfment of synaptic structures in ARS-2h**  
 612 **mice at 0.5 h/12 h post-stress induction.**

613 (a, b) Representative images (a) and quantitative analyses (b) of immunostaining for CD68  
 614 (red), Iba1 (green), and DAPI (blue) in the CeA of ARS-2h mice and corresponding controls at  
 615 0.5 h/12 h post-stress induction (n = 6 mice per group). Scale bars, 20  $\mu$ m.

616 (c) Representative images and 3D surface rendering of Iba1<sup>+</sup> microglia (green) containing  
 617 GAD65/67<sup>+</sup> puncta (red) in the CeA of ARS-2h and control mice at 0.5 h/12 h post-stress  
 618 induction. Scale bars, 50  $\mu$ m (overview) and 10  $\mu$ m (inset and rendering).

619 (d) Quantification of GAD65/67<sup>+</sup> puncta in microglia of mice from (c) (n = 53 cells from six  
 620 mice per group).

621 (e, f) Representative images (e) and quantitative analyses (f) of immunostaining for CD68 (red),

622 Iba1 (green), and GAD65/67<sup>+</sup> puncta (purple) in the CeA of ARS-2h and control mice at 0.5  
623 h/12 h post-stress induction (n = 24 cells from six mice per group). Scale bars, 5 μm.

624 All data are presented as mean ± SEM. \*\*\**p* < 0.001; n.s., not significant. See also Table S1.

625

626 9. The connection between stress-induced neuronal activity in the BLA and CX3CL1 signaling  
627 is not apparent. There are several neuroimmune signaling pathways altered by changes in  
628 neuronal activity. More rationale and supporting data for focusing on CX3CL1 should be  
629 provided. Also, CX3CL1 is a chemokine, not a pro-inflammatory cytokine, which should be  
630 corrected throughout the manuscript.

631 **Response:** We are grateful for this very interesting and important question that could provide  
632 additional mechanistic insight into how microglia govern the fading of acute stress-induced  
633 anxiety.

634 To address the comment that “There are several neuroimmune signaling pathways altered  
635 by changes in neuronal activity”, we used qPCR to screen for expression of a number of  
636 molecules previously reported to be involved in the response to stress and to mediate neuronal-  
637 microglia interactions<sup>57,58,59,60,61,62</sup>, including inflammatory chemokines (CX3CL1, CCL2,  
638 CXCL10), inflammatory cytokines (TNFα, IL-1β, IL-6, IL-4, IL-10, IL-33, IL-34, TGFβ,  
639 CSF1), complement proteins (C1q, C3), and growth factor (BDNF). We found that the mRNA  
640 levels of *Cx3cl1*, *Ccl2*, *Il-1β*, *Tnfa*, and *Il-6* (please see Response Document Figure 12, and also  
641 see new Supplementary Figure 12) were all significantly higher in the CeA of ARS-2h mice  
642 than in control animals at 0.5 h.

643 It is well known that the CX3CL1 is a secreted chemokine specifically expressed in  
644 neurons and engaged in microglia-neuron interactions that is widely reported to be involved in  
645 activity-dependent synaptic pruning of neurons<sup>25,53</sup>. While, CCL2, one of the most potent  
646 microglia/macrophage chemokines, is predominantly produced by astrocytes and resident  
647 microglia, and to a lesser extent, by endothelial cells<sup>63,64,65</sup>, and there are few studies on the  
648 involvement of CCL2 in synaptic pruning. In addition, TNFα, IL-1β, IL-6 are mainly released  
649 from microglia and our new results have shown that the increased levels of *Tnfa*, *Il-1β*, and *Il-6*  
650 mRNA are consistent with the upregulation of these cytokines in CeA microglia at 0.5 h post  
651 ARS-2h (please see Response Document Figure 9c-h, and also see new Supplementary Figure  
652 5c-h). It should be mentioned that activation of CeA<sup>GABA</sup> neurons precedes microglial activation  
653 in the CeA of ARS mice (please see original Extended Data Fig. 5), we therefore focused our  
654 study on the neuron-specific release of CX3CL1, which has been previously shown to play a  
655 role in emotional responses and trigger microglial engulfment in the brain in response to  
656 stressful stimuli<sup>53</sup>.

657 Finally, we thank the Reviewer for pointing out our misnomer of CX3CL1 as a pro-  
658 inflammatory cytokine. We have carefully checked the manuscript and used the correct term

659 throughout the revised manuscript. We provide these new results and expanded descriptions of  
660 our methods in the revised manuscript.

661

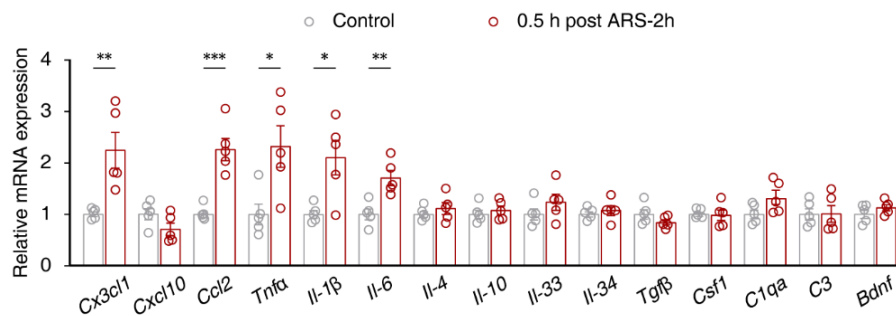

662

663 **Response Document Figure 12. Expression of factors related to neuroimmune signaling**  
664 **pathways in the CeA of ARS-2h mice.** qPCR analysis of mRNA levels of cytokines,  
665 chemokines, complement proteins, and growth factors in the CeA of ARS-2h mice (n = 5 mice  
666 per group).

667 All data are presented as mean ± SEM. \* $p < 0.05$ , \*\* $p < 0.01$ , and \*\*\* $p < 0.001$ . See also Table  
668 S1.

669

670 10. Beyond the rationale for targeting CX3CL1 there is an issue with interpretation of results  
671 in Fig.4g-l. Significant differences are not reported for vehicle controls at 0.5 and 12 hours on  
672 all the outcomes. This limits interpretation and does not support the conclusion that targeting  
673 CX3CL1 signaling with JM-17-2 and microglia are involved in the observed neurobiological,  
674 behavioral, or neurophysiological effects.

675 **Response:** Thanks for this helpful advice. As suggested by the Reviewer, we compared data  
676 from the vehicle controls obtained at 0.5 h and 12 h post ARS-2h. Examination of CeA<sup>GABA</sup>  
677 neuron dendritic spines revealed that spine density was obviously greater in these neurons at  
678 0.5 h post ARS-2h than that at 12 h post ARS-2h in the vehicle control animals (please see new  
679 Figure 4h). Furthermore, data from behavioral tests showed that vehicle control mice made  
680 fewer entries and spent less time in the central area of the OFT and open arms of the EPM at  
681 0.5 h post ARS-2h compared to vehicle control mice at 12 h post ARS-2h (please see new  
682 Figure 4i, j). Electrophysiological recordings showed that CeA<sup>GABA</sup> neuronal spontaneous firing  
683 activity was also higher in vehicle control mice at 0.5 h post ARS-2h compared with that at 12  
684 h post-ARS-2h (please see new Figure 4l), which was consistent with the results of behavioral  
685 tests. Based on the evidence showing that administration of JM-17-2 could prevent the recovery  
686 of processes by 12 h post ARS-2h observed in the vehicle control mice, it is reasonable to  
687 conclude that the CX3CL1 signaling pathway is indeed involved in the fading of ARS-induced  
688 reduction in exploratory behaviors, or so-called anxiety-like behaviors, in mice.

689 These additional supporting results have been added to the revised manuscript.

690 11. Related to the point above, it is unclear how MST4 was connected to CX3CL1 signaling in  
691 the brain. It is recommended that primary data in extended figures showing MST4 localization  
692 in neurons be included in the main figures. This is important as it provides direct evidence that  
693 targeted molecules are expressed in cells of interest. As described MST4 is an important  
694 regulator of NF- $\kappa$ B signaling. In this context, you would expect that it would influence other  
695 cytokines and chemokines. It is recommended that other molecular targets including IL-1b, IL-  
696 6, and TNF $\alpha$  be examined.

697 **Response:** Thanks for the very constructive comment. As suggested, we moved Supplementary  
698 Figure S7d to main Figure 5a and expanded our description of these results in the revised  
699 manuscript (please see new Figure 5a).

700 Regarding of the Reviewer's suggestions that "It is recommended that other molecular  
701 targets including IL-1b, IL-6, and TNF $\alpha$  be examined", as in response to your comment #9, we  
702 have used qPCR to screen for the expression of 15 molecules previously reported as involved  
703 in neuroimmune signalling pathways at the transcriptional level, including the levels of *Il-1 $\beta$* ,  
704 *Il-6*, and *Tnfa* mRNA in the CeA at 0.5 h post treatment in ARS-2h mice. We found that  
705 compared with control mice, the expression level of *Il-1 $\beta$* , *Il-6*, and *Tnfa* mRNA was increased  
706 significantly in the CeA of ARS-2h mice at 0.5 h post treatment (please see Response Document  
707 Figure 12, and also see new Supplementary Figure 12). Based on these findings, we have  
708 provided justification and evidence for why CX3CL1 was selected instead of other  
709 inflammatory-associated molecules for study.

710 This understanding, combined with our finding of decreased expression of the anti-  
711 inflammatory protein, MST4, in CeA<sup>GABA</sup> neurons after ARS (please see original Figure 5a, b),  
712 led to our hypothesis that MST4-regulated CX3CL1 participates in synaptic pruning of  
713 CeA<sup>GABA</sup> neurons by microglia, consequently mediating the fading of stress-induced aversion  
714 to novel environments and exploratory behaviors.

715 These new results are presented in the revised manuscript.

716

717 12. Several figures lack comprehensive statistical analyses. As noted, some important group  
718 differences are not reported and this limits data interpretation.

719 **Response:** Thanks for this helpful guidance. We have provided information regarding statistical  
720 tests and data to each figure legend, and as recommended, we have added comparisons of data  
721 from the control groups at different time points post-treatment. In addition, the statistical  
722 analysis for each figure is included in Supplementary Table S1 of the original manuscript.

723

724 **Other points:**

725 1. Studies used only male mice. This should be emphasized in the Results and Discussion.

726 **Response:** We appreciate this advice. We have updated the Results and Discussion sections of



727 our revised manuscript to emphasize that only male mice were used in our studies.

728

729 2. Sample sizes (as in the # of mice used) should be reported in figure legends.

730 **Response:** Done.

731

732 3. The summary figure in Extended Data is simplified and better suited for a review manuscript.

733 It is recommended that it be removed.

734 **Response:** Done.

735

736 The authors wish to take this opportunity to again thank the Reviewer for their careful review

737 of our paper and for their extremely helpful guidance that has helped us to greatly improve the

738 coherence and quality of our study.

739 **Reviewer #3:**

740 In this manuscript, Chen et al. investigates a novel role of microglia. The immediate behavioral  
741 outcome of an acute stress is a somewhat understudied element of the stress response. Chen et  
742 al. highlight the role of central amygdala inhibitory neurons in controlling anxiety-like  
743 behaviors following stress. They propose that microglia play a crucial role in the behavioral  
744 recovery via the engulfment of dendritic spines. The authors reveal the pathway necessary for  
745 the activation of microglia by inhibitory CeA neurons.

746 Overall, I find the manuscript very interesting and novel and was particularly impressed  
747 with the rigor with which the experiments seemed to be conducted and analyzed. The concerns  
748 I have are primarily related to the terminology and interpretation of the behavioral results.

749

750 1. Traditionally the term ‘extinction’ is a learning process where the repeated exposure to a cue  
751 without reinforcement/punishment leads to the fading of a behavior. In the manuscript, the  
752 behavioral analysis is not based on cue triggered behaviors nor repeated exposures. I believe  
753 the consistent use of a different term describing the fading or disappearance of the behavioral  
754 state evoked by acute stress would be very beneficial.

755 **Response:** We would first like to thank the Reviewer for their careful examination of our text,  
756 their supportive comments, and helpful guidance about how to improve our study. We agree  
757 with the Reviewer’s professional comments. Indeed, the term “extinction” is most commonly  
758 used in psychology-related studies, such as studies examining memory and fear<sup>66,67</sup>. In those  
759 experimental contexts, extinction refers to the process through which a learned behaviour or  
760 response is eliminated through withdrawal or rewards. This elimination involves repeated  
761 presentation of the conditioned stimulus in the absence of an unconditioned stimulus, leading  
762 to a gradual decrease and eventual extinction of the conditioned response. Thus, fading, may  
763 be a more appropriate term than extinction to describe the loss of a behavioral state evoked by  
764 stress. We have revised the manuscript accordingly.

765

766 2. The authors should show the distance data collected during open field or elevated plus maze  
767 exposures to make the claim that the behaviors reported are indeed anxiety-like and not just the  
768 results of decreased locomotion.

769 **Response:** We appreciate this advice. As suggested, we now provide the data for distance  
770 travelled by mice in the OFT. It should be noted that these data show no difference between the  
771 experimental and control groups, suggesting that ARS-2h does not affect locomotor ability of  
772 mice (please see Response Document Figure 14, and also see new Supplementary Figure 1),  
773 which are consistent with previous studies<sup>68,69</sup>. Additionally, we would like to mention that  
774 different batches of mice were used for each anxiety-related behavioral assay, including EPM  
775 and OFT, in order to avoid the impacts of the previous test on the current test. These new results

776 and related descriptions are now presented in the revised manuscript.

777

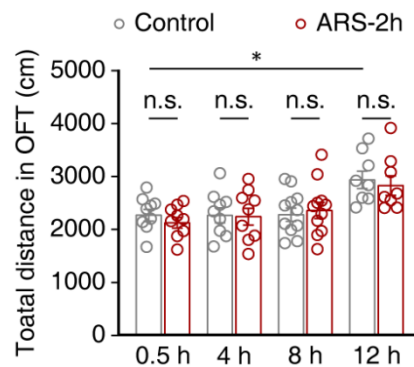

778

779 **Response Document Figure 14. Performance of ARS-2h-treated mice in open field tests at**  
780 **different time points.**

781 Summarized data of distance travelled in the central area of the OFT by ARS-2h mice at 0.5 h,  
782 4 h, 8 h, and 12 h post-stress induction and corresponding control mice. Different batches of  
783 mice were used for each OFT assay (0.5 h, n = 9 mice per group; 4 h, n = 9 mice per group; 8  
784 h, n = 11 mice per group; 12 h, n = 8 mice per group).

785 All data are presented as mean ± SEM. \* $p < 0.05$ ; n.s., not significant. See also Table S1.

786

787 3. The identification of inhibitory neurons during multi-channel recordings is challenging even  
788 with optogenetical tagging. The authors claim in the results section that in vivo multielectrode  
789 recordings showed an increase in the activity of CeA inhibitory. How can they be sure if in the  
790 methods section only 'putative CeA<sup>GABA</sup>' is mentioned? What is the reference for the  
791 identification?

792 **Response:** This issue really deserves our full attention in current multi-channel recording  
793 experiments. We apologize for our oversight in failing to explicitly describe the identification  
794 of inhibitory neurons in the CeA in the Methods section. Numerous previous studies have  
795 reported that the majority of neurons in the CeA are inhibitory GABAergic neurons, which are  
796 involved in the regulation of various emotional disorders, including anxiety and  
797 depression<sup>7,70,71,72</sup>. Although it was a previously widely held view that spikes with a shorter half-  
798 spike width and half-valley width and higher firing rate in multi-channel electrophysiological  
799 recordings can be classified as putative GABAergic neurons, increasing evidence suggests this  
800 approach can be unreliable.

801 To provide further support for our conclusions, we conducted additional optogenetic  
802 tagging experiments to label CeA<sup>GABA</sup> neurons by a combination of optogenetic techniques and  
803 multi-channel electrophysiological recordings in *GAD2-Cre* mice with CeA injection of AAV-  
804 DIO-ChR2-mCherry virus. Three weeks later, optrodes were implanted at the same site where  
805 the virus was injected. The optrode was constructed by surrounding an optical fiber (200 μm

806 core, Newdoon) with four tetrodes, the tips of which were 200  $\mu\text{m}$  longer than the fiber<sup>13,14</sup>. To  
 807 identify CeA<sup>GABA</sup> neurons, blue-light pulses (470 nm, 2 ms duration, 20 Hz) were delivered at  
 808 the end of each recording session at high frequency. Only laser-evoked and spontaneous spikes  
 809 with highly similar waveforms (correlation coefficient > 0.9) were considered as originating  
 810 from a single neuron. In subsequent experiments, we classified well-isolated units according to  
 811 the typical firing pattern of light-evoked GABAergic neurons using an unsupervised clustering  
 812 algorithm based on a  $\kappa$ -means method<sup>73,74</sup>. Specifically, spikes with a shorter half-spike width  
 813 and half-valley width and higher firing rate were classified as putative GABAergic neurons in  
 814 the CeA. These results, along with a detailed description, have been included in the revised  
 815 manuscript (please see Response Document Figure 15, and also see new Supplementary Figure  
 816 2).

817 We now present these new results and provide more information necessary to understand  
 818 our process for neuronal classification in the revised Methods section.  
 819

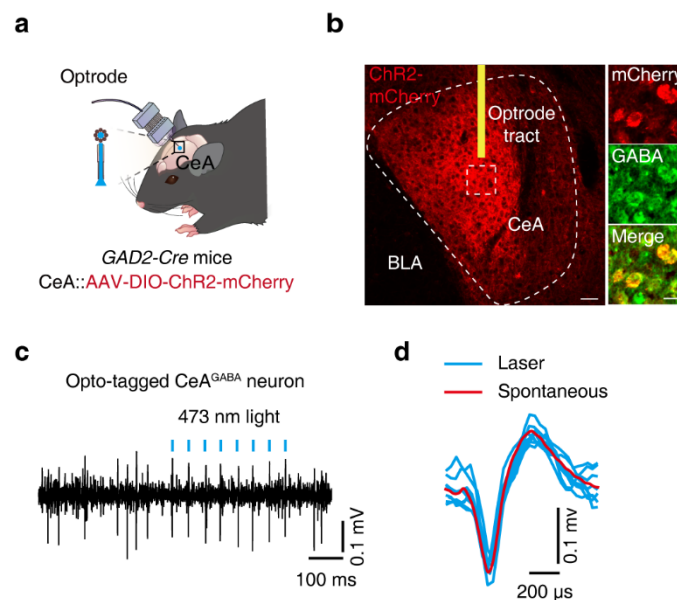

820  
 821 **Response Document Figure 15. Identification of characteristic CeA<sup>GABA</sup> neuronal spike**  
 822 **waveforms.**

823 (a) Schematic for optogenetic tagging and electrophysiological recording. Enlarged area shows  
 824 optrodes.

825 (b) Representative images of virus injection site in the CeA (left) and mCherry<sup>+</sup> neurons  
 826 colocalized with immunofluorescent signal for GABAergic neurons (right). Scale bars, 50  $\mu\text{m}$   
 827 (left) and 20  $\mu\text{m}$  (right).

828 (c, d) Example recording of spontaneous and light-evoked spikes from a CeA<sup>GABA</sup> neuron (c)  
 829 and overlay of averaged spontaneous (red) and light-evoked (blue) spike waveforms from the  
 830 example unit (d).

831 Typo: throughout the paper it says 'Extended Date Fig.' instead of Extended Data Fig.

832 **Response:** Done.

833

834 We again thank the Reviewer for their supportive comments and very helpful critique which  
835 has helped us to improve our experimental rigour and ultimately increased the purport of our  
836 conclusions.

837 **References**

- 838 1. Ayyar VS, Sukumaran S. Circadian rhythms: influence on physiology, pharmacology,  
839 and therapeutic interventions. *J Pharmacokinet Pharmacodyn* **48**, 321-338 (2021).
- 840 2. Xie L, *et al.* Cholecystokinin neurons in mouse suprachiasmatic nucleus regulate the  
841 robustness of circadian clock. *Neuron* **111**, 2201-2217 e2204 (2023).
- 842 3. Weinert D, Freyberg S, Touitou Y, Djeridane Y, Waterhouse JM. The phasing of  
843 circadian rhythms in mice kept under normal or short photoperiods. *Physiol Behav* **84**,  
844 791-798 (2005).
- 845 4. Kakefuda K, *et al.* Diacylglycerol kinase beta knockout mice exhibit lithium-sensitive  
846 behavioral abnormalities. *PLoS One* **5**, e13447 (2010).
- 847 5. Ip JY, *et al.* Gomafu lncRNA knockout mice exhibit mild hyperactivity with enhanced  
848 responsiveness to the psychostimulant methamphetamine. *Sci Rep* **6**, 27204 (2016).
- 849 6. Harvey K, *et al.* Intracranial Cannula Implantation for Serial Locoregional Chimeric  
850 Antigen Receptor (CAR) T Cell Infusions in Mice. *J Vis Exp*, (2023).
- 851 7. Zhou W, *et al.* A neural circuit for comorbid depressive symptoms in chronic pain. *Nat*  
852 *Neurosci* **22**, 1649-1658 (2019).
- 853 8. Sugama S, Takenouchi T, Hashimoto M, Ohata H, Takenaka Y, Kakinuma Y. Stress-  
854 induced microglial activation occurs through beta-adrenergic receptor: noradrenaline  
855 as a key neurotransmitter in microglial activation. *J Neuroinflammation* **16**, 266 (2019).
- 856 9. Yamanishi K, *et al.* Acute stress induces severe neural inflammation and overactivation  
857 of glucocorticoid signaling in interleukin-18-deficient mice. *Transl Psychiatry* **12**, 404  
858 (2022).
- 859 10. Koo JW, Russo SJ, Ferguson D, Nestler EJ, Duman RS. Nuclear factor-kappaB is a  
860 critical mediator of stress-impaired neurogenesis and depressive behavior. *Proc Natl*  
861 *Acad Sci U S A* **107**, 2669-2674 (2010).
- 862 11. Zhang Y, *et al.* Restraint stress induces lymphocyte reduction through p53 and  
863 PI3K/NF-kappaB pathways. *J Neuroimmunol* **200**, 71-76 (2008).
- 864 12. Bollinger JL, Bergeon Burns CM, Wellman CL. Differential effects of stress on  
865 microglial cell activation in male and female medial prefrontal cortex. *Brain Behav*  
866 *Immun* **52**, 88-97 (2016).
- 867 13. Zhu X, *et al.* Distinct thalamocortical circuits underlie allodynia induced by tissue  
868 injury and by depression-like states. *Nat Neurosci* **24**, 542-553 (2021).
- 869 14. Zhou W, *et al.* Sound induces analgesia through corticothalamic circuits. *Science* **377**,  
870 198-204 (2022).
- 871 15. Bollinger JL, Collins KE, Patel R, Wellman CL. Behavioral stress alters corticolimbic  
872 microglia in a sex- and brain region-specific manner. *PLoS One* **12**, e0187631 (2017).
- 873 16. Winkler Z, Kuti D, Ferenczi S, Gulyas K, Polyak A, Kovacs KJ. Impaired microglia  
874 fractalkine signaling affects stress reaction and coping style in mice. *Behav Brain Res*  
875 **334**, 119-128 (2017).
- 876 17. Nie X, *et al.* The Innate Immune Receptors TLR2/4 Mediate Repeated Social Defeat  
877 Stress-Induced Social Avoidance through Prefrontal Microglial Activation. *Neuron* **99**,  
878 464-479 e467 (2018).
- 879 18. Aderem A, Ulevitch RJ. Toll-like receptors in the induction of the innate immune  
880 response. *Nature* **406**, 782-787 (2000).

- 881 19. Medzhitov R. Recognition of microorganisms and activation of the immune response.  
882 *Nature* **449**, 819-826 (2007).
- 883 20. O'Shea JJ, Murray PJ. Cytokine signaling modules in inflammatory responses.  
884 *Immunity* **28**, 477-487 (2008).
- 885 21. Yang FM, Chang HM, Yeh ETH. Regulation of TLR4 signaling through the  
886 TRAF6/sNASP axis by reversible phosphorylation mediated by CK2 and PP4. *Proc*  
887 *Natl Acad Sci U S A* **118**, (2021).
- 888 22. Jiao S, *et al.* The kinase MST4 limits inflammatory responses through direct  
889 phosphorylation of the adaptor TRAF6. *Nat Immunol* **16**, 246-257 (2015).
- 890 23. Fang J, *et al.* TRAF6 Mediates Basal Activation of NF-kappaB Necessary for  
891 Hematopoietic Stem Cell Homeostasis. *Cell Rep* **22**, 1250-1262 (2018).
- 892 24. Jessen KR. Glial cells. *Int J Biochem Cell Biol* **36**, 1861-1867 (2004).
- 893 25. Faust TE, Gunner G, Schafer DP. Mechanisms governing activity-dependent synaptic  
894 pruning in the developing mammalian CNS. *Nat Rev Neurosci* **22**, 657-673 (2021).
- 895 26. Neniskyte U, Gross CT. Errant gardeners: glial-cell-dependent synaptic pruning and  
896 neurodevelopmental disorders. *Nat Rev Neurosci* **18**, 658-670 (2017).
- 897 27. Presumey J, Bialas AR, Carroll MC. Complement System in Neural Synapse  
898 Elimination in Development and Disease. *Adv Immunol* **135**, 53-79 (2017).
- 899 28. Dejanovic B, *et al.* Complement C1q-dependent excitatory and inhibitory synapse  
900 elimination by astrocytes and microglia in Alzheimer's disease mouse models. *Nat*  
901 *Aging* **2**, 837-850 (2022).
- 902 29. Hong S, *et al.* Complement and microglia mediate early synapse loss in Alzheimer  
903 mouse models. *Science* **352**, 712-716 (2016).
- 904 30. Werneburg S, *et al.* Targeted Complement Inhibition at Synapses Prevents Microglial  
905 Synaptic Engulfment and Synapse Loss in Demyelinating Disease. *Immunity* **52**, 167-  
906 182 e167 (2020).
- 907 31. Michailidou I, *et al.* Complement C1q-C3-associated synaptic changes in multiple  
908 sclerosis hippocampus. *Ann Neurol* **77**, 1007-1026 (2015).
- 909 32. Paolicelli RC, *et al.* Synaptic pruning by microglia is necessary for normal brain  
910 development. *Science* **333**, 1456-1458 (2011).
- 911 33. Gunner G, *et al.* Sensory lesioning induces microglial synapse elimination via  
912 ADAM10 and fractalkine signaling. *Nat Neurosci* **22**, 1075-1088 (2019).
- 913 34. Nguyen PT, *et al.* Microglial Remodeling of the Extracellular Matrix Promotes  
914 Synapse Plasticity. *Cell* **182**, 388-403 e315 (2020).
- 915 35. He D, *et al.* Disruption of the IL-33-ST2-AKT signaling axis impairs  
916 neurodevelopment by inhibiting microglial metabolic adaptation and phagocytic  
917 function. *Immunity* **55**, 159-173 e159 (2022).
- 918 36. Vainchtein ID, *et al.* Astrocyte-derived interleukin-33 promotes microglial synapse  
919 engulfment and neural circuit development. *Science* **359**, 1269-1273 (2018).
- 920 37. Blanco-Suarez E, Caldwell AL, Allen NJ. Role of astrocyte-synapse interactions in  
921 CNS disorders. *J Physiol* **595**, 1903-1916 (2017).
- 922 38. Chung WS, *et al.* Astrocytes mediate synapse elimination through MEGF10 and  
923 MERTK pathways. *Nature* **504**, 394-400 (2013).
- 924 39. Auguste YSS, *et al.* Oligodendrocyte precursor cells engulf synapses during circuit

- remodeling in mice. *Nat Neurosci* **25**, 1273-1278 (2022).
- 926 40. Heinz DE, *et al.* Exploratory drive, fear, and anxiety are dissociable and independent  
927 components in foraging mice. *Transl Psychiatry* **11**, 318 (2021).
- 928 41. Cryan JF, Holmes A. The ascent of mouse: advances in modelling human depression  
929 and anxiety. *Nat Rev Drug Discov* **4**, 775-790 (2005).
- 930 42. Crawley JN. Exploratory behavior models of anxiety in mice. *Neurosci Biobehav Rev*  
931 **9**, 37-44 (1985).
- 932 43. Berglund R, *et al.* Microglial autophagy-associated phagocytosis is essential for  
933 recovery from neuroinflammation. *Sci Immunol* **5**, (2020).
- 934 44. Xu F, *et al.* Prolonged anesthesia induces neuroinflammation and complement-  
935 mediated microglial synaptic elimination involved in neurocognitive dysfunction and  
936 anxiety-like behaviors. *BMC Med* **21**, 7 (2023).
- 937 45. Au NPB, Ma CHE. Neuroinflammation, Microglia and Implications for Retinal  
938 Ganglion Cell Survival and Axon Regeneration in Traumatic Optic Neuropathy. *Front*  
939 *Immunol* **13**, 860070 (2022).
- 940 46. Zhou J, *et al.* The neuronal pentraxin Nptx2 regulates complement activity and restrains  
941 microglia-mediated synapse loss in neurodegeneration. *Sci Transl Med* **15**, eadf0141  
942 (2023).
- 943 47. Gehrman J, Banati RB. Microglial turnover in the injured CNS: activated microglia  
944 undergo delayed DNA fragmentation following peripheral nerve injury. *J Neuropathol*  
945 *Exp Neurol* **54**, 680-688 (1995).
- 946 48. Lawson LJ, Perry VH, Gordon S. Turnover of resident microglia in the normal adult  
947 mouse brain. *Neuroscience* **48**, 405-415 (1992).
- 948 49. Askew K, *et al.* Coupled Proliferation and Apoptosis Maintain the Rapid Turnover of  
949 Microglia in the Adult Brain. *Cell Rep* **18**, 391-405 (2017).
- 950 50. Asakuno K, *et al.* The exogenous control of transfected c-fos gene expression and  
951 angiogenesis in cells implanted into the rat brain. *Brain Res* **702**, 23-31 (1995).
- 952 51. Yuan T, Orock A, Greenwood-Van Meerveld B. Amygdala microglia modify neuronal  
953 plasticity via complement C1q/C3-CR3 signaling and contribute to visceral pain in a  
954 rat model. *Am J Physiol Gastrointest Liver Physiol* **320**, G1081-G1092 (2021).
- 955 52. Acharjee S, *et al.* Reduced Microglial Activity and Enhanced Glutamate Transmission  
956 in the Basolateral Amygdala in Early CNS Autoimmunity. *J Neurosci* **38**, 9019-9033  
957 (2018).
- 958 53. Cao P, *et al.* Early-life inflammation promotes depressive symptoms in adolescence  
959 via microglial engulfment of dendritic spines. *Neuron* **109**, 2573-2589 e2579 (2021).
- 960 54. Frank MG, Fonken LK, Watkins LR, Maier SF. Acute stress induces chronic  
961 neuroinflammatory, microglial and behavioral priming: A role for potentiated NLRP3  
962 inflammasome activation. *Brain Behav Immun* **89**, 32-42 (2020).
- 963 55. Augustine V, *et al.* Temporally and Spatially Distinct Thirst Satiation Signals. *Neuron*  
964 **103**, 242-249 e244 (2019).
- 965 56. Lee S, *et al.* Chemosensory modulation of neural circuits for sodium appetite. *Nature*  
966 **568**, 93-97 (2019).
- 967 57. Wohleb ES, Terwilliger R, Duman CH, Duman RS. Stress-Induced Neuronal Colony  
968 Stimulating Factor 1 Provokes Microglia-Mediated Neuronal Remodeling and



- 969 Depressive-like Behavior. *Biol Psychiatry* **83**, 38-49 (2018).
- 970 58. Zhang J, *et al.* IL4-driven microglia modulate stress resilience through BDNF-  
971 dependent neurogenesis. *Sci Adv* **7**, (2021).
- 972 59. Qing H, *et al.* Origin and Function of Stress-Induced IL-6 in Murine Models. *Cell* **182**,  
973 372-387 e314 (2020).
- 974 60. Taniguchi S, Elhance A, Van Duzer A, Kumar S, Leitenberger JJ, Oshimori N. Tumor-  
975 initiating cells establish an IL-33-TGF-beta niche signaling loop to promote cancer  
976 progression. *Science* **369**, (2020).
- 977 61. De Schepper S, *et al.* Perivascular cells induce microglial phagocytic states and  
978 synaptic engulfment via SPP1 in mouse models of Alzheimer's disease. *Nat Neurosci*  
979 **26**, 406-415 (2023).
- 980 62. Umpierre AD, Wu LJ. How microglia sense and regulate neuronal activity. *Glia* **69**,  
981 1637-1653 (2021).
- 982 63. Kim RY, *et al.* Astrocyte CCL2 sustains immune cell infiltration in chronic  
983 experimental autoimmune encephalomyelitis. *J Neuroimmunol* **274**, 53-61 (2014).
- 984 64. Cherry JD, *et al.* CCL2 is associated with microglia and macrophage recruitment in  
985 chronic traumatic encephalopathy. *J Neuroinflammation* **17**, 370 (2020).
- 986 65. Harkness KA, Sussman JD, Davies-Jones GA, Greenwood J, Woodroffe MN.  
987 Cytokine regulation of MCP-1 expression in brain and retinal microvascular  
988 endothelial cells. *J Neuroimmunol* **142**, 1-9 (2003).
- 989 66. Maren S, Phan KL, Liberzon I. The contextual brain: implications for fear conditioning,  
990 extinction and psychopathology. *Nat Rev Neurosci* **14**, 417-428 (2013).
- 991 67. Pace-Schott EF, Germain A, Milad MR. Effects of sleep on memory for conditioned  
992 fear and fear extinction. *Psychol Bull* **141**, 835-857 (2015).
- 993 68. Fan KQ, *et al.* Stress-Induced Metabolic Disorder in Peripheral CD4(+) T Cells Leads  
994 to Anxiety-like Behavior. *Cell* **179**, 864-879 e819 (2019).
- 995 69. McCall JG, *et al.* CRH Engagement of the Locus Coeruleus Noradrenergic System  
996 Mediates Stress-Induced Anxiety. *Neuron* **87**, 605-620 (2015).
- 997 70. Haubensak W, *et al.* Genetic dissection of an amygdala microcircuit that gates  
998 conditioned fear. *Nature* **468**, 270-276 (2010).
- 999 71. Ahrens S, *et al.* A Central Extended Amygdala Circuit That Modulates Anxiety. *J*  
1000 *Neurosci* **38**, 5567-5583 (2018).
- 1001 72. Tye KM, *et al.* Amygdala circuitry mediating reversible and bidirectional control of  
1002 anxiety. *Nature* **471**, 358-362 (2011).
- 1003 73. Liu L, *et al.* Cell type-differential modulation of prefrontal cortical GABAergic  
1004 interneurons on low gamma rhythm and social interaction. *Sci Adv* **6**, eaay4073 (2020).
- 1005 74. Breton-Provencher V, Sur M. Active control of arousal by a locus coeruleus  
1006 GABAergic circuit. *Nat Neurosci* **22**, 218-228 (2019).

## REVIEWER COMMENTS

### Reviewer #1 (Remarks to the Author):

The authors have adequately addressed my previous concerns by adding new experimental data and discussions. To further improve the paper, it is better to add a schematic model illustrating the main conclusions.

### Reviewer #2 (Remarks to the Author):

The authors have addressed some of my primary concerns, but there are remain significant issues with data interpretation.

In particular, the authors continue to use anxiety-like behavior to describe rodent behaviors.

They also maintain that morphological features of microglia provide evidence of neuroinflammation. Some immunohistology for colocalization of TNF $\alpha$ , IL1b, and IL6 are presented but these proteins are notoriously difficult to immunolabel. Antibodies should be tested in corresponding knockout mice or other molecular analyses should be used to validate proposed neuroinflammatory phenotype.

The authors also contend that increases in microglia are due to rapid proliferation, but Ki67 immunolabeling is suspicious and does not look confined to the nucleus. Further it appears that TUNEL immunolabeling is observed in non-microglia cells at 8 hours, which is concerning.

Other new data support some conclusions, but no orthogonal images are provided to validate colocalization of synaptic markers and lysosomes.

Also the authors provide an unconvincing arguments to why their controls had high levels of synaptic engulfment (in the original submission).

Last, the title seems problematic as it is unclear what "fading" means in the context of behavioral outcomes. Also the use of only male mice should be noted in the title.

Reviewer #3 (Remarks to the Author):

The authors have adequately addressed all my comments.

1 **Response to referees**

2

3 **Manuscript ID:** NCOMMS-23-10335B

4 **Title:** Microglia govern the extinction of acute stress-induced low level of exploratory  
5 behaviors in male mice

6

7 We sincerely appreciate the time and efforts of the Editor and Reviewers in evaluating our study.

8 In light of their thoughtful critique, we have performed additional experiments to validate our

9 previous data and responded to each of their concerns with support from the literature. We have

10 also thoroughly revised the manuscript and incorporated these suggestions into the revised

11 manuscript where appropriate. The revised manuscript with tracked changes ([highlighted in](#)

12 [blue](#)) has been uploaded as a separate file. The detailed changes and our point-by-point

13 responses to each of the Reviewers' comments are presented below.

14 **Reviewer #1 (Remarks to the Author):**

15 The authors have adequately addressed my previous concerns by adding new experimental data  
16 and discussions. To further improve the paper, it is better to add a schematic model illustrating  
17 the main conclusions.

18 **Response:** We appreciate the Reviewer's thoughtful comments and guidance throughout the  
19 review process. As suggested by the Reviewer, we have added a schematic model to the revised  
20 manuscript illustrating our main conclusions (Response Figure 1 and new Supplementary  
21 Figure 16).

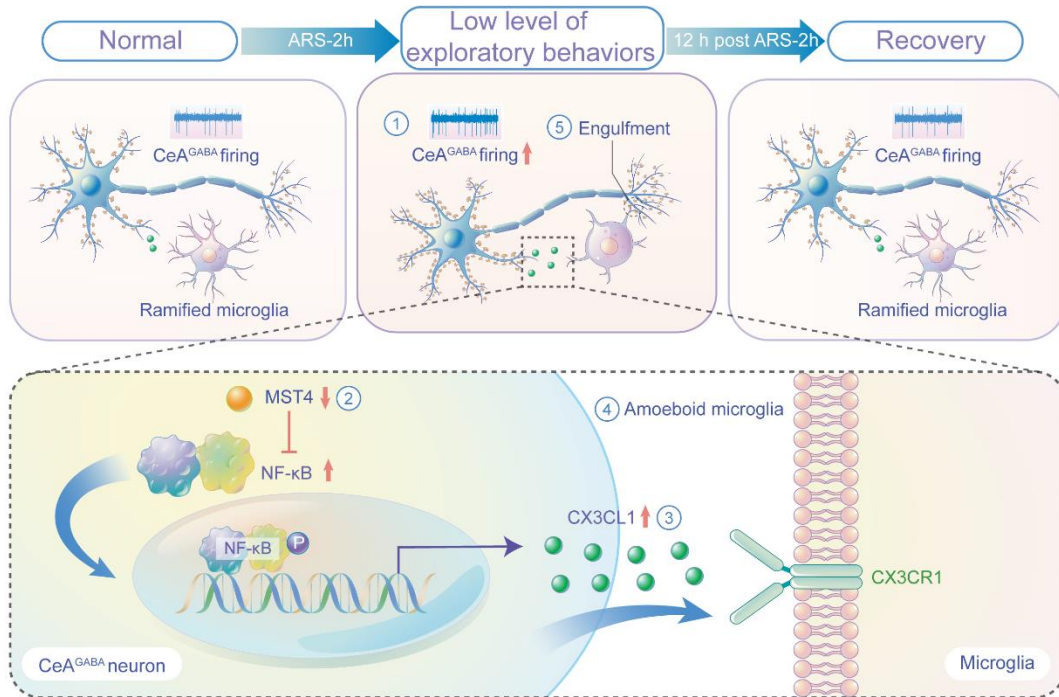

22

23 **Response Figure 1. Microglial engulfment of dendritic spines promotes the extinction of**  
24 **acute stress-induced low level of exploratory behaviors.**

25 Low level of exploratory behaviors following acute restraint are relieved within 12 hours after  
26 stress induction in male mice. Suppression of NF-κB by MST4 stimulates production of  
27 CX3CL1 by CeA<sup>GABA</sup> neurons, which increases under acute restraint stress and subsequently  
28 activates microglia in the CeA, promoting engulfment of dendritic spines. Microglial  
29 engulfment of dendritic spines in the CeA leads to feedback inhibition that attenuates CeA<sup>GABA</sup>  
30 neuronal hyperactivity, restoring them to non-stress levels and leading to extinction of low level  
31 of exploratory behaviors.

32 **Reviewer #2 (Remarks to the Author):**

33 The authors have addressed some of my primary concerns, but there are remain significant  
34 issues with data interpretation.

35

36 1. In particular, the authors continue to use anxiety-like behavior to describe rodent behaviors.

37 **Response:** We completely agree that using the term “anxiety-like behavior” may be an  
38 inaccurate description of the phenotype defined by EPM and OFT behavioral assays, since these  
39 tests cannot fully capture the complexity of anxiety disorders. As suggested, we have replaced  
40 the “anxiety-like behaviors” with “low level of exploratory behaviors” in the revised  
41 manuscript.

42

43 2. They also maintain that morphological features of microglia provide evidence of  
44 neuroinflammation. Some immunohistology for colocalization of TNF $\alpha$ , IL1b, and IL6 are  
45 presented but these proteins are notoriously difficult to immunolabel. Antibodies should be  
46 tested in corresponding knockout mice or other molecular analyses should be used to validate  
47 proposed neuroinflammatory phenotype.

48 **Response:** Following the Reviewer’s advice, we examined neuroinflammation in the CeA  
49 using *Cx3cr1-GFP* transgenic mice, which express a GFP label in microglial cells throughout  
50 the brain. We then isolated CeA microglia by fluorescence-activated cell sorting (FACS), and  
51 examined changes in *Tnf- $\alpha$* , *Il-1 $\beta$*  and *Il-6* transcript levels by qPCR. The results showed that  
52 all of these inflammatory markers were expressed at significantly higher levels in ARS-2h mice  
53 than in CeA microglia of non-stressed controls at 0.5 h post-stress treatment (**Response Figure**  
54 **2, and new Supplementary Figure 5c-e**). We hope the Reviewer is now convinced that the  
55 observed cellular responses are indeed associated with increased neuroinflammation.

56 These new results are presented in the revised manuscript.

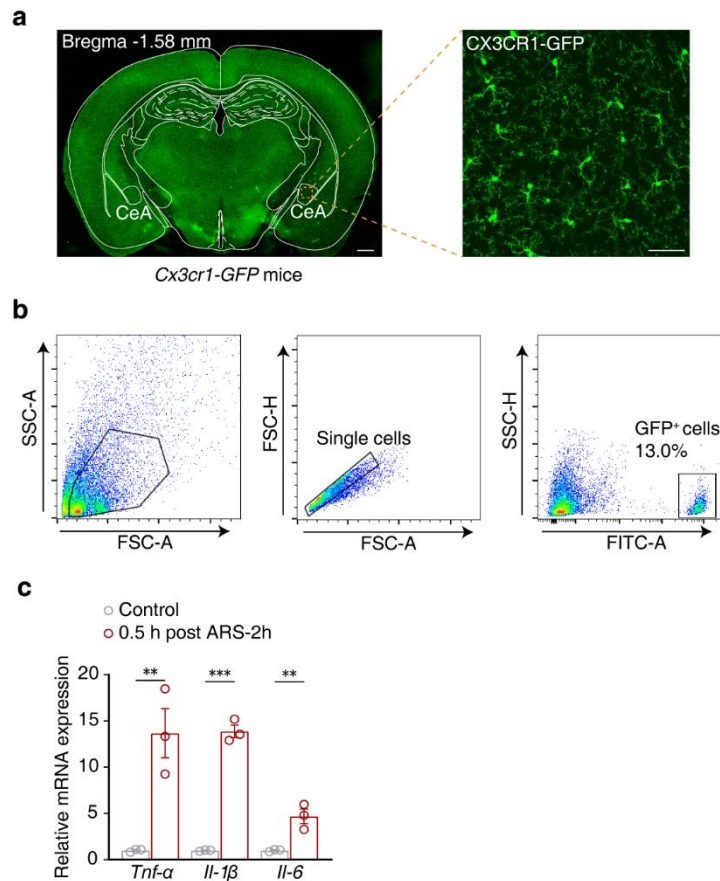

**Response Figure 2. Expression of classical inflammatory factors in microglia from the CeA of ARS-2h mice.**

**a**, Representative images of microglia in the CeA of *Cx3cr1-GFP* mice. Scale bars, 500  $\mu$ m (left) and 50  $\mu$ m (right). **b**, Gating strategy of the cell subpopulations in the CeA GFP<sup>+</sup> microglia analyzed by flow cytometry. **c**, qPCR analysis of *Tnf- $\alpha$* , *Il-1 $\beta$*  and *Il-6* mRNA levels in CeA microglia of ARS-2h and control mice (n = 3 samples per group). All data show mean  $\pm$  SEM. \*\**p* < 0.01, and \*\*\**p* < 0.001. Also see Table S1.

3. The authors also contend that increases in microglia are due to rapid proliferation, but Ki67 immunolabeling is suspicious and does not look confined to the nucleus. Further it appears that TUNEL immunolabeling is observed in non-microglia cells at 8 hours, which is concerning.

**Response:** We thank the Reviewer for close attention to detail and for their alternative interpretations of Ki67 and TUNEL staining. We have conducted new experiments to address the potential artifacts the Reviewer has proposed.

Regarding the “suspicious” Ki67 immunolabeling that “does not look confined to the nucleus”, we agree that these doubts warrant further consideration. Ki67 is commonly used to detect cell proliferation based on its role in the cell cycle, and therefore immunostains for Ki67 should localize to the nucleus. We examined numerous studies and product validation documents to search for possible causes of Ki67 signal outside of the nucleus and found that

77 although colocalization of Ki67 and nuclear signals have been reported in many studies using  
 78 the same antibody we selected for our work (Cat# 14-5698-82, Invitrogen)<sup>1,2,3,4,5</sup>, some articles  
 79 reported incomplete colocalization with the nuclear signal<sup>6,7,8</sup>. This inconsistency suggested  
 80 that the Ki67 antibody we used might be defective or otherwise exhibit poor specificity for  
 81 Ki67. We therefore chose another widely used Ki67 antibody (Cat# 12202, Cell Signaling  
 82 Technology)<sup>9,10,11</sup> and repeated the Ki67 immunolabeling experiments in mouse brain slices.  
 83 The results showed strong co-labeling of Ki67 with the nucleus of Iba1<sup>+</sup> microglia in CeA  
 84 microglia of ARS-2h mice at 0.5 h and 8 h post treatment, while there were no Ki67 signals in  
 85 control or ARS-2h mice at 12 h post treatment (Response Figure 3a, and new Supplementary  
 86 Figure 6a). These results suggest that Ki67 immunolabeling does not look confined to the  
 87 nucleus in our previous experiment potentially due to poor specificity of the Ki67 antibody.

88 Regarding the TUNEL immunolabeling observed in non-microglial cells at 8 hours post  
 89 treatment, in our previous experiment, it is possible that: although widely used for detecting  
 90 apoptosis in various cell types, TUNEL cannot specifically differentiate microglial apoptosis  
 91 from apoptosis in other cells, which could be occurring in non-microglial cells in the  
 92 CeA under restraint-induced acute stress conditions. For example, previous studies have shown  
 93 apoptosis in microglia of multiple brain regions induced by chronic stress is accompanied by  
 94 loss of other, non-microglia cells<sup>12,13</sup>; Further, after stress occurs in mice, monocytes and other  
 95 macrophages in the peripheral blood will enter the brain through the blood-brain barrier to  
 96 function<sup>14,15</sup>. However, it is still unclear whether these peripheral cells entering the brain also  
 97 undergo apoptosis to restore brain homeostasis after the removal of stress stimuli.

98 These collective results suggest that proliferation and apoptosis of microglia likely  
 99 contribute to changes in microglia density, further illustrating the dynamic activation of  
 100 microglia and their subsequent restoration to resting levels in the CeA following ARS-2h  
 101 treatment. We hope these replicate experiments, which are presented in the revised manuscript,  
 102 allay the Reviewer's doubts about the quality of the data.

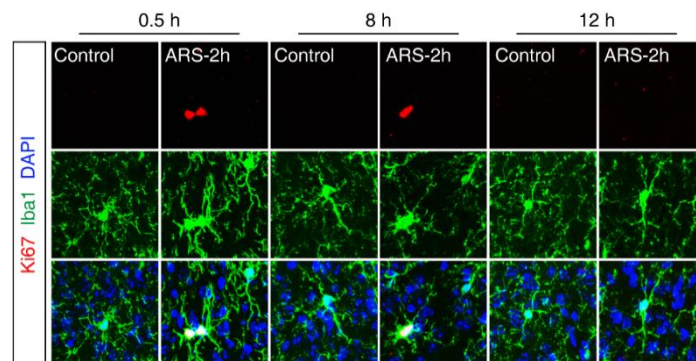

103  
 104 **Response Figure 3. Immunofluorescence staining for Ki67 following ARS-2h treatment in**  
 105 **mice.**

106 Representative images of immunostaining for Ki67 (red), Iba1 (green), and DAPI (blue) in the



107 CeA of ARS-2h and control mice at 0.5 h/8 h/12 h post-stress induction. Scale bars, 10  $\mu$ m.

108

109 4. Other new data support some conclusions, but no orthogonal images are provided to validate  
110 colocalization of synaptic markers and lysosomes.

111 **Response:** We appreciate this advice. Although 3D reconstruction has been used in other  
112 studies to effectively demonstrate the phagocytosis of microglia<sup>16,17,18</sup>, we agree that orthogonal  
113 images could provide direct and solid validation of synaptic marker colocalization with  
114 lysosomes. As suggested, we now provide orthogonal images depicting colocalization between  
115 immunoreactive puncta of GAD65/67, CD68, and Iba1<sup>+</sup> microglia in the revised manuscript  
116 (**Response Figure 4, and new Figure 3i**).

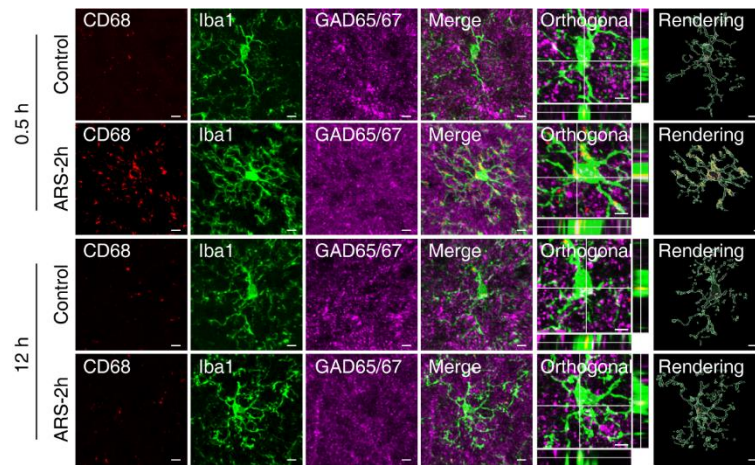

117

118 **Response Figure 4. Microglial engulfment of synaptic structures in ARS-2h mice at 0.5**  
119 **h/12 h post-stress induction.**

120 Representative images of immunostaining for CD68 (red), Iba1 (green), and GAD65/67<sup>+</sup> puncta  
121 (purple) in the CeA of ARS-2h and control mice at 0.5 h/12 h post-stress induction. Orthogonal  
122 images have been included. Scale bars, 5  $\mu$ m.

123

124 5. Also the authors provide an unconvincing arguments to why their controls had high levels of  
125 synaptic engulfment (in the original submission).

126 **Response:** Regarding the Reviewer's concern, our argument in the "response to referees" for  
127 Manuscript ID: NCOMMS-23-1335A is as follows:

128 *Regarding the Reviewer's concern that "these results are questionable as it appears*  
129 *that even in control mice there is an unusually high number of inclusions in*  
130 *microglia", we believe that there may be two reasons for this. First, we checked the*  
131 *related studies of the GAD65/67 antibody (ab183999, abcam) used in this study. The*  
132 *WB experiments of the antibody are provided by the official website of Abcam*  
133 *([https://www.abcam.cn/products/primary-antibodies/gad65--gad67-antibody-](https://www.abcam.cn/products/primary-antibodies/gad65--gad67-antibody-epr19366-ab183999.html)*  
134 *[epr19366-ab183999.html](https://www.abcam.cn/products/primary-antibodies/gad65--gad67-antibody-epr19366-ab183999.html)), which showed two bands with antibodies against GAD67*

135 *and GAD65 fragment recombinant proteins in mouse. In addition, the GAD65/67*  
136 *antibody have been widely used in immunofluorescent staining in numerous*  
137 *studies<sup>19,20</sup>. Second, although there are many GAD65/67 punctas in microglia from*  
138 *control mice, we found that the macrophage marker CD68 is rarely expressed in the*  
139 *control mice (please see original Figure 3g, h), so there should not be as much*  
140 *microglial engulfment in the control mice. Therefore, it seems that the low threshold*  
141 *adjustment in the algorithm of the microglial engulfment analysis results in unusually*  
142 *high number of inclusions in microglia from control mice. Briefly, the Imaris*  
143 *MATLAB-based (MathWorks) plugin “Split into Surface Objects” was used to assess*  
144 *the number of GAD65/67 puncta in microglia (distance  $\leq 0 \mu\text{m}$ ). Based on this*  
145 *analytical method, the data of the engulfed synaptic marker are from the GAD65/67*  
146 *puncta that entirely within microglia as well as those distributed on these cell surface.*  
147 *As suggested, we have readjusted the “Estimated XY Diameter” from  $0.8 \mu\text{m}$  to  $0.9$*   
148  *$\mu\text{m}$ , which is used to estimate the size of GAD65/67 puncta. After adjusting the*  
149 *parameters, we found that the number of GAD65/67 puncta in microglia from the*  
150 *control groups and ARS-2h mice were significantly reduced, but the increase in the*  
151 *number of GAD65/67 puncta in CeA microglia at 0.5 h post-ARS-2h compared with*  
152 *control mice, was still remained (please see Response Document Figure 11c, d, and*  
153 *also see new Figure 3h). These results indicate that the threshold is indeed too low.*

154  
155 We appreciate the Reviewer’s efforts to ensure the rigor of our data, and we regret that  
156 they found our previous explanation unconvincing. To more convincingly illustrate our point,  
157 we now provide images of the control group in Figure 3h before and after adjusting the  
158 “Estimated XY Diameter” threshold in the IMARIS software. After readjusting “Estimated XY  
159 Diameter” from  $0.8 \mu\text{m}$  to  $0.9 \mu\text{m}$ , which is used to estimate the size of GAD65/67 puncta, we  
160 found that the number of GAD65/67 puncta significantly decreased in control group microglia  
161 (Response Figure 5a, b), suggesting that the high levels of synaptic engulfment in the control  
162 group was likely due to an excessively low threshold setting ( $0.8 \mu\text{m}$ ). Moreover, in order to  
163 clearly demonstrate the specific phagocytosis of microglia, we also now provide orthogonal  
164 images validating GAD65/67 colocalization with microglia (Response Figure 5c).

165 The Reviewer will kindly note that we have already provided experimental data after  
166 adjusting the threshold of size of GAD65/67 puncta to  $0.9 \mu\text{m}$  in the previous round of review.  
167 Those data clearly demonstrate that both ARS-2h and control mice have significantly fewer  
168 GAD65/67 puncta in microglia at baseline compared to the original data generated with an  $0.8$   
169  $\mu\text{m}$  threshold, while the significant increase in GAD65/67 puncta in CeA microglia at 0.5 h  
170 post-ARS-2h, but not control mice, could still be observed (Response Figure 5d, e, and new  
171 Figure 3h).

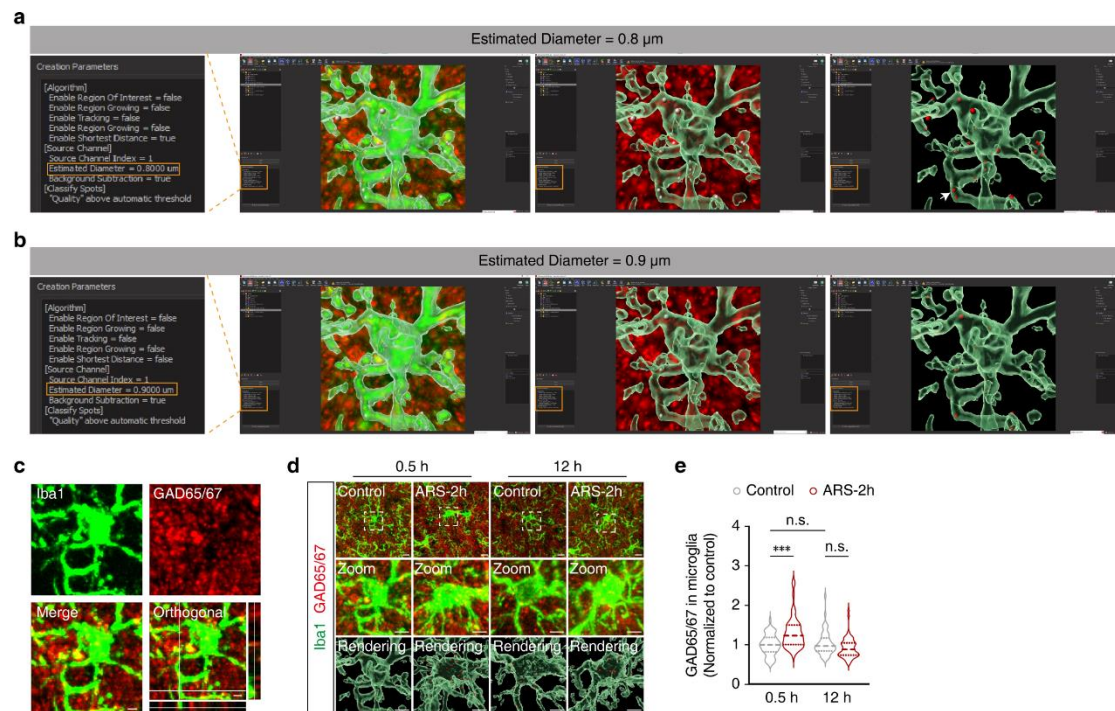

173

174

**Response Figure 5. Comparison of GAD65/67<sup>+</sup> puncta quantification in control microglia by IMARIS software at different “Estimated XY Diameter” thresholds.**

175

176

**a, b**, Representative images from IMARIS software of GAD65/67<sup>+</sup> puncta quantification in CeA microglia of control mice from Figure 3h using an “Estimated XY Diameter” threshold of

177

0.8 µm (**a**) and “Estimated XY Diameter” of 0.9 µm (**b**). **c**, Example orthogonal image without spots after adjusting parameters. The position of this field of view is indicated by the white

178

arrow in (**a**). Scale bars, 2 µm. **d**, Representative images and 3D surface rendering of Iba1<sup>+</sup> microglia (green) containing GAD65/67<sup>+</sup> puncta (red) in the CeA of ARS-2h and control mice

179

at 0.5 h/12 h post-stress induction. Scale bars, 50 µm (overview) and 10 µm (inset and rendering). **e**, Summary of GAD65/67<sup>+</sup> puncta quantification in microglia of mice from (**d**) (n

180

= 53 cells from six mice per group). All data show mean ± SEM. \*\*\**p* < 0.001, n.s., not significant. Also see Table S1.

181

182

183

184

185

186

187

6. Last, the title seems problematic as it is unclear what “fading” means in the context of behavioral outcomes. Also the use of only male mice should be noted in the title.

188

189

**Response:** We agree with this constructive assessment. Although we thought “extinction” might be appropriate in the original manuscript, we were concerned that is most commonly

190

used in psychology-related studies, such as research exploring the neural mechanisms of memory and fear<sup>21,22</sup>. Upon further consideration, we believe extinction may connote a meaning

191

consistent with the dynamic behavioral changes observed in our study. As recommended, we have replaced “fading” with “extinction” in the most recent version of the manuscript, and we

192

193

194

195 have added the term “male mice” to comply with journal policy. After careful consideration of  
196 the Reviewer’s comments, we have changed the title to **Microglia govern the extinction of**  
197 **acute stress-induced low level of exploratory behaviors in male mice.**

198

199 We again thank the Reviewer for constructive critique towards ensuring the rigor of our  
200 experiments. We hope the Reviewer now finds our evidence sufficiently convincing that we  
201 have indeed found a bona fide phenomenon of microglial response to acute stress.

202 **Reviewer #3 (Remarks to the Author):**

203 The authors have adequately addressed all my comments.

204 **Response:** We appreciate the Reviewer's thoughtful comments throughout the review process.

205

206 **References**

- 207 1. Soucie EL, *et al.* Lineage-specific enhancers activate self-renewal genes in  
208 macrophages and embryonic stem cells. *Science* **351**, aad5510 (2016).
- 209 2. Kamizaki K, *et al.* The Ror1 receptor tyrosine kinase plays a critical role in regulating  
210 satellite cell proliferation during regeneration of injured muscle. *J Biol Chem* **292**,  
211 15939-15951 (2017).
- 212 3. Casanova-Acebes M, *et al.* Tissue-resident macrophages provide a pro-tumorigenic  
213 niche to early NSCLC cells. *Nature* **595**, 578-584 (2021).
- 214 4. Denoth-Lippuner A, *et al.* Visualization of individual cell division history in complex  
215 tissues using iCOUNT. *Cell Stem Cell* **28**, 2020-2034.e2012 (2021).
- 216 5. Yamaguchi N, *et al.* Voluntary running exercise modifies astrocytic population and  
217 features in the peri-infarct cortex. *IBRO Neurosci Rep* **14**, 253-263 (2023).
- 218 6. O'Connell JS, *et al.* Treatment of necrotizing enterocolitis by conditioned medium  
219 derived from human amniotic fluid stem cells. *PLoS One* **16**, e0260522 (2021).
- 220 7. Koren E, *et al.* ARTS mediates apoptosis and regeneration of the intestinal stem cell  
221 niche. *Nat Commun* **9**, 4582 (2018).
- 222 8. Zondervan RL, Jenkins DC, Reicha JD, Hankenson KD. Thrombospondin-2  
223 spatiotemporal expression in skeletal fractures. *J Orthop Res* **39**, 30-41 (2021).
- 224 9. Wang Z, *et al.* Binding of PLD2-Generated Phosphatidic Acid to KIF5B Promotes  
225 MT1-MMP Surface Trafficking and Lung Metastasis of Mouse Breast Cancer Cells.  
226 *Dev Cell* **43**, 186-197.e187 (2017).
- 227 10. Kim BH, Jung HW, Seo SH, Shin H, Kwon J, Suh JM. Synergistic actions of FGF2 and  
228 bone marrow transplantation mitigate radiation-induced intestinal injury. *Cell Death*  
229 *Dis* **9**, 383 (2018).
- 230 11. Metzger R, Maruskova M, Krebs S, Janssen KP, Krug AB. Increased Incidence of  
231 Colon Tumors in AOM-Treated Apc (1638N/+) Mice Reveals Higher Frequency of  
232 Tumor Associated Neutrophils in Colon Than Small Intestine. *Front Oncol* **9**, 1001  
233 (2019).
- 234 12. Guo J, *et al.* Microglia Loss and Astrocyte Activation Cause Dynamic Changes in  
235 Hippocampal [(18)F]DPA-714 Uptake in Mouse Models of Depression. *Front Cell*  
236 *Neurosci* **16**, 802192 (2022).
- 237 13. Su D, *et al.* Chronic exposure to aflatoxin B1 increases hippocampal microglial  
238 pyroptosis and vulnerability to stress in mice. *Ecotoxicol Environ Saf* **258**, 114991  
239 (2023).
- 240 14. Wohleb ES, Powell ND, Godbout JP, Sheridan JF. Stress-induced recruitment of bone  
241 marrow-derived monocytes to the brain promotes anxiety-like behavior. *J Neurosci* **33**,  
242 13820-13833 (2013).
- 243 15. Yu X, *et al.* Extracellular vesicle-mediated delivery of circDYM alleviates CUS-  
244 induced depressive-like behaviours. *J Extracell Vesicles* **11**, e12185 (2022).

- 245 16. Anderson SR, *et al.* Complement Targets Newborn Retinal Ganglion Cells for  
246 Phagocytic Elimination by Microglia. *J Neurosci* **39**, 2025-2040 (2019).
- 247 17. Lee JY, *et al.* Neuronal SphK1 acetylates COX2 and contributes to pathogenesis in a  
248 model of Alzheimer's Disease. *Nat Commun* **9**, 1479 (2018).
- 249 18. Fu AK, *et al.* IL-33 ameliorates Alzheimer's disease-like pathology and cognitive  
250 decline. *Proc Natl Acad Sci U S A* **113**, E2705-2713 (2016).
- 251 19. Augustine V, *et al.* Temporally and Spatially Distinct Thirst Satiation Signals. *Neuron*  
252 **103**, 242-249 e244 (2019).
- 253 20. Lee S, *et al.* Chemosensory modulation of neural circuits for sodium appetite. *Nature*  
254 **568**, 93-97 (2019).
- 255 21. Maren S, Phan KL, Liberzon I. The contextual brain: implications for fear conditioning,  
256 extinction and psychopathology. *Nat Rev Neurosci* **14**, 417-428 (2013).
- 257 22. Pace-Schott EF, Germain A, Milad MR. Effects of sleep on memory for conditioned  
258 fear and fear extinction. *Psychol Bull* **141**, 835-857 (2015).
- 259

## REVIEWERS' COMMENTS

### Reviewer #2 (Remarks to the Author):

The authors have provided relevant details and data to support their conclusions. I appreciate their efforts to address my prior reviews. I remain concerned about low sample sizes ( $n < 5$ ) for several studies, as well as the rigor and interpretation of approaches to examine microglia morphology, turnover (proliferation and apoptosis), and synaptic engulfment. In particular, the authors should note the potential limitations and technical issues uncovered in response to my prior comments (i.e., non-specific antibodies). This is important as it can lead to spurious conclusions about how microglia shape neurobiology. Specifically that autofluorescence in microglia can be mistaken for "antibody-labeled material (see Stillman et al, biorxiv, 2023).

1 **Response to referees**

2

3 **Manuscript ID:** NCOMMS-23-10335C

4 **Title:** Microglia govern the extinction of acute stress-induced anxiety-like behaviors in male  
5 mice

6

7 We sincerely appreciate the time and efforts of the Editor and Reviewers in evaluating our study.

8 As suggested, we have thoroughly revised the manuscript and incorporated these suggestions

9 into the revised manuscript where appropriate. The revised manuscript with tracked changes

10 (highlighted in blue) has been uploaded as a separate file. The detailed changes and our point-

11 by-point responses to each of the Reviewers' comments are presented below.



12 **Reviewer #2:**

13 The authors have provided relevant details and data to support their conclusions. I appreciate  
14 their efforts to address my prior reviews.

15 1. I remain concerned about low sample sizes ( $n < 5$ ) for several studies, as well as the rigor and  
16 interpretation of approaches to examine microglia morphology, turnover (proliferation and  
17 apoptosis), and synaptic engulfment. In particular, the authors should note the potential  
18 limitations and technical issues uncovered in response to my prior comments (i.e., non-specific  
19 antibodies). This is important as it can lead to spurious conclusions about how microglia shape  
20 neurobiology. Specifically that autofluorescence in microglia can be mistaken for "antibody-  
21 labeled material (see Stillman et al, biorxiv, 2023).

22 **Response:** We greatly appreciate these constructive comments.

23 In our study, three samples were only used in the experiments for qPCR detection of  
24 inflammatory genes for each group after fluorescence-activated cell sorting of CeA microglia  
25 in this study (Supplementary Fig. 5). It should be pointed out that the minimum number of cells  
26 used for qPCR should not be less than  $10^6$ , in order to meet this experimental requirement each  
27 sample here refers to the total number of CeA microglia obtained from 20 mice, which is due  
28 to the small CeA brain region of mice. Moreover, since the significant differences have already  
29 been developed on the basis of the three samples for each inflammatory gene between control  
30 and ARS-2h mice (*Tnf- $\alpha$* ,  $p = 0.0090$ ; *Il-1 $\beta$* ,  $p < 0.0001$ ; *Il-6*,  $p = 0.0094$ ), we did not further  
31 increase more sample size.

32 Regarding the Reviewer's concern about the specificity of antibodies, this is indeed a very  
33 general issue in the field, and we have provided a detailed explanation to this issue in the last  
34 "Response to referees". In addition, as mentioned by the Reviewer, a recent study has reported  
35 that the autofluorescence of lipofuscin can be likely detected within microglial lysosomes in  
36 the adult mouse brain by light microscopy<sup>1</sup>. To address this general issue in the field, we used  
37 the same aged mice as corresponding controls to detect microglial engulfment throughout our  
38 study, which was able to minimize the possibility that autofluorescence could be mistaken for  
39 an "antibody-labeled material" affecting statistical differences.

40 Considering the potential impact of the specificity of antibodies and autofluorescence on  
41 the conclusions raised by the Reviewers, we have highlighted these limitations in the discussion  
42 of the revised manuscript.

43  
44 We thank the Reviewer for the helpful guidance about how to improve our study.

45  
46 **References**

- 47 1. Stillman JM, Mendes Lopes F, Lin JP, Hu K, Reich DS, Schafer DP. Lipofuscin-like  
48 autofluorescence within microglia and its impact on studying microglial engulfment.
