# Supplementary material for: Microglia govern the extinction of acute stress-induced anxiety-like behaviors in male mice
Source: PubMed Central journal article supplement (PMC10781988; doi:10.1038/s41467-024-44704-6), 2024-01-10
Supplement: 41467_2024_44704_MOESM3_ESM.pdf [file 41467_2024_44704_MOESM3_ESM.pdf]

## **Description of Additional Supplementary Files**

### **Supplementary Datasets**

Supplementary Data 1. Statistical analyses related to Figures 1-6 and Supplementary Figures 1-15.

Supplementary Data 2. Key resources table.

Supplementary Data 3. Primers used in this study.
